1 **Title:**

2 Complex effects of day and night temperature fluctuations on thermally plastic traits in a  
3 seasonal plasticity model.

4

5 **Authors:**

6 Yara Katia Rodrigues <sup>1</sup>, Erik van Bergen <sup>1</sup>, Filipa Alves <sup>1</sup>, David Duneau <sup>2\*</sup>, Patrícia Beldade

7 <sup>1,2\*</sup>

8

9 **Affiliations:**

10 <sup>1</sup> Instituto Gulbenkian de Ciência, Oeiras, Portugal

11 <sup>2</sup> UMR 5174 - CNRS, Evolution et Diversité Biologique, University Paul Sabatier, Toulouse,

12 France

13 \* equal contribution

14 Corresponding author: pbeldade@igc.gulbenkian.pt

15

16

17 **Abstract:**

18 **Background:** Changes in development in response to seasonally variable environments can  
19 produce phenotypes adjusted to fluctuating seasonal conditions and help organisms cope with  
20 temporal heterogeneity. In contrast to what happens in natural situations, experimental studies  
21 of developmental plasticity typically use environmental factors held constant during  
22 development, precluding assessment of potential environment-by-environment interaction  
23 effects.

24 **Results:** We tested effects of circadian fluctuations in temperature on a series of thermally  
25 plastic traits in a model of adaptive seasonal plasticity, the butterfly *Bicyclus anynana*.  
26 Comparing phenotypes from individuals reared under two types of fluctuations (warmer days  
27 with cooler nights, and cooler days with warmer nights) and those reared under a constant  
28 temperature of the same daily average allowed us to identify complex patterns of response to  
29 day and night temperatures. We found evidence of additive-like effects (for body size), but also  
30 different types of “dominance”-type effects where one particular period of the light cycle (for  
31 development time) or one particular extreme temperature (for eyespot size) had a relatively  
32 larger contribution to phenotype expression. We also gathered evidence against the hypothesis  
33 that thermal plasticity in development time drives thermal plasticity in other traits.

34 **Conclusions:** Combined effects of fluctuating day and night temperatures include additive-like  
35 effects as well as different types of environmental-dominance interaction effects. Differences  
36 between plastic traits reveal independent responses to temperature, and possible independent  
37 assessment of temperature conditions. Our study underscores the importance of understanding  
38 how organisms integrate complex environmental information towards a complete understanding  
39 of natural phenotypic variation and of the potential impact of environmental change thereon.

40

41 **Keywords:**

42 Environment-by-environment interactions; Circadian temperature fluctuations; Adaptive  
43 developmental plasticity; *Bicyclus anynana*; Seasonal polyphenism; environmental  
44 “dominance”

45

## 46 **Background**

47 Phenotypic diversity results from complex interactions between organisms and their  
48 environments, which happen at different time scales. External environmental conditions  
49 contribute to selecting phenotypic variants across generations, but also to generating variation  
50 by affecting organismal development. The phenomenon by which environmental conditions  
51 affect developmental rates and/or trajectories, leading to the production of distinct phenotypes  
52 from the same genotype, is called developmental plasticity [1]. This plasticity is adaptive if the  
53 phenotypes generated in response to the environmental conditions experienced during  
54 development are better adjusted to the environmental conditions the organisms will experience  
55 during adulthood [1,2]. In this manner, plasticity offers a means for organisms to cope with  
56 environment heterogeneity, such as that characteristic of alternating seasons. Seasonal  
57 polyphenism refers to distinct phenotypes being produced in response to seasonally variable  
58 environmental factors, such as temperature and photoperiod [3,4]. Compelling examples include  
59 wing development in aphids [4,5], wing pigmentation in butterflies [3,6–8], and diapause in a  
60 variety of animals [9,10].

61

62 Effects of external environmental factors on development have been amply documented for  
63 various traits and species [11,12], as have gene-by-environment (GxE) interactions [13,14].  
64 Efforts to partition genetic effects into additive and interaction components take into account  
65 that there are multiple genes and alleles whose individual effects can depend on the genetic  
66 context (GxG effects). In contrast, much less attention has been given to potential environment-  
67 by-environment (ExE) interactions [15–17]. Traditionally, experimental studies of  
68 developmental plasticity have focused on the effects of single environmental factors held  
69 constant during the time it takes to complete development. This is in stark contrast with the  
70 complexity of natural situations, where multiple and highly dynamic environmental factors can  
71 have distinct effects on different genotypes and plastic traits. Towards a more complete account  
72 of phenotypic variation, recent studies have started to address phenotypic effects of  
73 combinations of different types of cues [18–20]. Less attention has been given to changes in

74 particular environmental factors during development [21,22]. Environmental factors such as  
75 temperature fluctuate regularly not only with the yearly seasons, but also with the daily light-  
76 dark cycle. Despite the prevalence and importance of circadian fluctuations in ambient  
77 temperature, we still lack a clear understanding of the combined effects of day and night  
78 temperatures on thermally plastic traits, such as those described for the seasonally plastic  
79 butterfly *Bicyclus anynana*.

80

81 *B. anynana* has become a valuable experimental model of adaptive developmental plasticity,  
82 where we can integrate information about the evolution and ecological significance of plasticity  
83 with knowledge about its physiological underpinnings [7,23–25]. In its natural habitat in sub-  
84 Saharan Africa, these butterflies typically have two seasonal forms that differ in various traits in  
85 association with alternative strategies for avoiding predation and for reproduction. Relative to  
86 wet-season form butterflies, dry-season form individuals are larger and delay reproduction until  
87 host plants become available for a new generation of larvae [8,26,27]. Dry-season individuals  
88 also have less conspicuous wing patterns and their dull brown coloration is thought to provide  
89 camouflage against the background of dry leaves, thereby helping resting butterflies escape  
90 predators' attention [8,28,29]. Wet-season butterflies, on the contrary, minimize predator attack  
91 by deflecting the attention of predators away from the fragile body, towards their wing margins  
92 decorated with conspicuous wing pattern elements called eyespots [30,31]. The main  
93 environmental cue determining which form will be produced is the temperature experienced  
94 during development [8,32]. Developmental temperature affects the dynamics of ecdysone titres,  
95 which, in turn, regulates the response of a suite of plastic traits [24,33]. With only two  
96 exceptions [34,35], laboratory studies of *B. anynana* plasticity used temperatures held constant  
97 during light and dark hours of the day.

98

99 Here, we compared a series of thermally plastic traits between individuals reared under three  
100 constant temperatures or under circadian temperature fluctuations with the same daily average  
101 as the intermediate constant temperature (Fig. 1a). To probe the effects of the association

102 between temperature and light, we included two regimes with temperature fluctuations: warmer  
103 days and cooler nights, as well as the reverse situation. We tested the null hypothesis of no  
104 interaction between day and night temperatures by comparing the effect of temperature  
105 fluctuations with those of the constant temperature of the same daily average. We also tested the  
106 null hypothesis of no association between temperature and light phase by comparing the two  
107 types of fluctuations. We found differences between target traits in relation to the combined  
108 effects of day and night temperature, including additive and non-additive effects of different  
109 kinds. Finally, our data also provide evidence against a previous suggestion that the effect of  
110 circadian temperature fluctuations on different thermally plastic traits is a consequence of their  
111 direct effects on development time.

112

## 113 **Methods**

### 114 **Butterflies and temperature treatments**

115 We used a captive outbred population of the tropical butterfly *B. anynana* [23] kept in climate-  
116 controlled conditions with 65% humidity and 12-12 hrs light-dark cycles (Sanyo MLR-351H or  
117 Aralab FITOCLIMA 1000 EH incubators). Caterpillars were fed with young maize plants and  
118 adults with sliced banana on wet cotton. To set our experiment, we collected eggs from a large  
119 cohort of adults housed at 27°C and allowed them to hatch at the same temperature. Each day  
120 for a period of four days, we collected first instar larvae (L1) and randomly assigned them to  
121 cages with 22 L1 each that were split into five temperature treatments. Three treatments had  
122 constant temperatures: 19°C and 27°C extremes (simulating typical average temperatures of the  
123 dry and wet seasons, respectively), and an intermediate of 23°C. Two additional treatments had  
124 a daily average temperature of 23°C, but cyclical fluctuations with the light-dark cycle between  
125 the two extreme temperatures (Fig. 1a). For each of these five thermal regimes, we had four  
126 replicate cohorts in four independent cages. The position of the cohorts within each incubator  
127 was changed regularly, and food availability was monitored daily. We checked larval cages  
128 daily and transferred pre-pupae into individual cups where they were monitored for pupation  
129 and adult eclosion. Adults were allowed to fully stretch their wings before being frozen at -

130 20°C. Wings were dissected and stored at 4°C until phenotypic analysis.

131

### 132 **Quantification of phenotypic traits**

133 We quantified the response to thermal regimes for various thermally-plastic life-history and  
134 wing pigmentation traits. We monitored development time by recording the number of days  
135 from L1 larvae to pre-pupae, from pre-pupae to pupae, and from pupae to adult, and we  
136 calculated total development time by adding those. We measured two proxies of body size:  
137 pupal mass and adult wing area. For pupal mass, one-day-old pupae were weighed to the nearest  
138 0.001g (KERN ABS 80-4N scale). For wing area, we scanned the ventral surface of adult  
139 hindwings using a colour-calibrated digital scanner (Epson V600) and analysed the resulting  
140 images with a set of custom-made interactive Mathematica notebooks (Wolfram Research, Inc.,  
141 Mathematica, Version 10.2, Champaign, IL, 2015) to measure hindwing area and a series of  
142 wing pigmentation traits. For the colour pattern measurements, we first drew two contiguous  
143 transects defined by the centre of the fifth eyespot, which is often used to document wing  
144 pattern plasticity in this and other species [8,36], and four wing landmarks (on the wing margin  
145 and intersection between veins; Fig. 1b-c) in that eyespot's wing compartment. We marked the  
146 limits of each of the colour rings along the transect (central white focus, middle black disc, and  
147 external golden ring) to determine ring diameters and calculate the approximate eyespot area  
148 (considering it as a circle). The colour of eyespot rings and wing background were quantified  
149 using the mean RGB values of the pixels in 3-pixel high rectangles centred on the transect. For  
150 the wing background colour, we used the most proximal 50 pixels of the transect, corresponding  
151 to a wing region without any defined colour pattern element (Fig. 1c). RGB values were  
152 converted to HSB (Hue, Saturation, and Brightness) using the *rgb2hsv* function in R.  
153 Background colour was characterized by the brightness value in the HSB colour space; high  
154 brightness values corresponding to lighter colours.

155

### 156 **Statistical analyses**

157 We compared phenotypes between temperature treatments, each of which included four

158 replicate cages with up to 22 individuals per cage. All statistical tests were done with R [37],  
159 separately for males and females. When appropriate, Normal distribution and homoscedasticity  
160 of the residuals were tested with Shapiro-Wilk normality tests and Brush-Pagan tests,  
161 respectively. We used a general linear hypotheses test (glht) to test for differences between  
162 thermal regimes, followed by Tukey post Hoc pairwise comparisons ( $\alpha=0.05$ ) to ascertain  
163 differences between pairs of treatments (package *multcomp* in R).

164

165 First, to test for differences in development time, we used a Cox proportional hazards model to  
166 determine whether “treatment” influenced the proportions of adult eclosions over time (package  
167 *Survival* in R). For the different developmental stages and each sex, we tested the model  $\text{Coxph}$   
168  $\text{survival}(\text{time}, \text{eclosion}) \sim \text{replicate} + \text{treatment}$ . Second, to test for differences in body size  
169 (pupal weight and wing area) and wing pigmentation (eyespot size and wing background  
170 colour), we applied a linear model and tested the model:  $\text{trait} \sim \text{replicate} + \text{treatment}$ . The trait  
171 “relative eyespot size” corresponded to the ratio between eyespot area and wing area, for which  
172 the assumption of a normal distribution of the residuals was confirmed by a Shapiro test.  
173 Finally, to test for the correlation between developmental time and relative eyespot area, we  
174 used a correlation test with a Spearman method, with the  $p$  values corrected and adjusted by the  
175 False Discovery Rate (FDR) [38]. The same type of analysis was used to investigate the  
176 correlation between developmental time and relative eyespot size using a dataset combining  
177 previously published data on development time [39] and on eyespot size [36] in *B. anynana*.

178

## 179 **Results**

180 We tested the effect of circadian temperature fluctuations on different thermally plastic traits:  
181 development time (Fig. 2), body size (Fig. 3), and wing pigmentation (Fig. 4). We first  
182 compared phenotypes between the three treatments with constant temperatures to assess the  
183 direction and strength of thermal plasticity in our *B. anynana* population and experimental  
184 conditions. We then compared phenotypes between the three treatments of the same daily  
185 average temperature to assess the contribution of day and night temperatures to the phenotype.

186 We found different responses for different traits, including additive and non-additive effects of  
187 different types. We finally tested the correlation between development time and eyespot size,  
188 using our and another independent dataset (Fig. 5).

189

#### 190 **Different contributions of day and night temperatures to development time**

191 We confirmed thermal plasticity in *B. anynana* development time in our study population:  
192 individuals reared at lower temperatures took longer to reach adulthood than individuals reared  
193 at higher temperatures (Fig. 2a). For both males and females, temperature affected the duration  
194 of all developmental stages monitored; individuals from warmer temperatures had shorter larval,  
195 pre-pupal, and pupal stages (Fig. 2b).

196

197 We also found differences in development time between the three treatments with a daily  
198 average temperature of 23°C (Fig. 2c). For both males and females, development was faster for  
199 individuals that spent the day at 27°C and the night at 19°C (27-19 treatment) compared to  
200 individuals that spent the day at 19°C and the night at 27°C (19-27 treatment). The duration of  
201 the pupal stage differed between treatments, but not the duration of the larval and of the pre-  
202 pupal stages (Fig. 2d). The difference between our two treatments with fluctuating temperatures  
203 revealed that the effect of day and night temperature on development time is not additive and  
204 that the temperature experienced during the light phase had a larger impact on total development  
205 time. Individuals reared with a day temperature of 27°C demonstrated a shift in development  
206 time towards individuals reared at constant 27°C, while the development time of individuals  
207 reared with a day temperature of 19°C shifted towards those reared at a constant temperature of  
208 19°C. The response for individuals reared at a constant temperature of 23°C relative to the two  
209 fluctuations of the same daily mean (27-19 and 19-27) differed between males and females (Fig.  
210 2c-d).

211

#### 212 **No difference between fluctuations and constant daily temperature for body size**

213 For both proxies of body size we quantified, pupal mass (Fig. 3a) and adult wing area (Fig. 3b),



214 we confirmed known thermal plasticity patterns, with lower temperatures yielding larger  
215 individuals. For both sexes, individuals reared at 19°C were significantly larger than individuals  
216 reared at 23°C or 27°C, which did not differ significantly between each other.

217

218 Overall, we found no significant differences between individuals reared under constant versus  
219 fluctuating temperatures of the same daily average (Fig. 3c-d). This corresponds to an additive-  
220 like effect of day and night temperatures on body size. The only exception was female pupal  
221 mass, where we found a significant difference between the two fluctuating temperature  
222 treatments. Like for development time, the temperature experienced during the light phase had a  
223 stronger effect on the phenotype (Fig. 3c).

224

225 **Different contributions of cool and warm temperatures to eyespot size but not wing**  
226 **background brightness**

227 We investigated two aspects of wing pigmentation (Fig. 4): relative eyespot size, which is a trait  
228 well known to be thermally plastic, and wing background colour, which had not been quantified  
229 before despite suggestions of it also varying between seasonal forms. As had been noticed but  
230 not formally quantified before, females are lighter than males and wing background colour  
231 depends on rearing temperature, but only for males (Fig. 4a). Plasticity for eyespot size was  
232 much stronger, with significant differences between all three constant temperature treatments  
233 (Fig. 4b). This is in line with the well described thermal plasticity for *B. anynana* eyespot size,  
234 with larger eyespots in animals reared at warmer temperatures, for both males and females.

235

236 Regarding the comparison between constant and fluctuating temperatures of daily average of  
237 23°C, we found similar results for males and females: no differences for wing darkness (Fig. 4c)  
238 and clear differences for eyespot size (Fig. 4d). Individuals reared at either of the two  
239 fluctuating temperature regimes had larger eyespots than those reared at the constant  
240 temperature of 23°C, and were not significantly different from each other. Results for overall  
241 eyespot area were consistent with those for the area of individual eyespot rings (central white

242 focus, middle black disc, and external golden ring), which also showed sex and temperature  
243 differences in actual colours (Fig. 4e and Additional file 1).

244

#### 245 **Correlation between eyespot size and development time between but not within** 246 **temperature treatments**

247 It had been previously suggested that thermal plasticity in traits such as eyespot size, rather than  
248 a direct response to temperature, is a correlated response to temperature-induced changes in  
249 development time [29,35,40]. This is not consistent with our results which show that individuals  
250 reared at 19-27 developed slower than those from 27-19, but both had larger eyespots than  
251 individuals reared at 23°C. We thus went on to investigate the correlation between development  
252 time and eyespot size, both across and within temperature treatments. We used our dataset with  
253 five thermal regimes, as well as an additional independent dataset put together from published  
254 work that includes two extra constant temperature treatments [36,39] (Fig. 5).

255

256 Across constant temperature treatments, with largely non-overlapping development times, we  
257 found an overall strong negative correlation between development time and eyespot size, for  
258 both females and males (Fig. 5a-b). However, within temperature treatments, there were no  
259 correlations between development times and relative eyespot sizes that were statistically  
260 significantly different from zero. This result was confirmed using an independent dataset from  
261 previously published studies that included more intermediate temperature treatments (Fig. 5c).

262

#### 263 **Discussion**

264 We investigated the effects of combinations of day and night temperatures on a series of  
265 thermally plastic traits in *B. anynana* butterflies. We confirmed and quantified thermal plasticity  
266 in our experimental population and conditions for development time, body size, and eyespot  
267 size, and documented thermal plasticity in wing background colour. Butterflies reared under  
268 warmer temperatures generally had faster development, smaller bodies and larger eyespots,  
269 matching the seasonal polyphenism described for the species [6,7,24,25]. To assess potential

270 interaction effects of day and night temperatures, we then compared phenotypes from  
271 individuals reared under two types of circadian temperature fluctuations and under a constant  
272 temperature of the same daily average.

273

#### 274 **Combined effects of day and night temperature on thermally plastic traits**

275 If day and night temperatures contributed equally to phenotype expression, i.e. if their effects  
276 were purely “additive”, to borrow from the terminology used to partition genetic effects, we  
277 should have no difference between the two types of fluctuations (our 27-19 and 19-27 regimes),  
278 and also no difference between those and the treatment with constant temperature of the same  
279 daily average (23°C). We found evidence of such additive effects (for body size; Fig. 3), but  
280 also of “dominance”-type effects where one particular period of the light cycle (for development  
281 time; Fig. 2) or one particular extreme temperature (for eyespot size; Fig. 4) had a relatively  
282 larger contribution to phenotype.

283

284 Two previous studies had addressed the effect of circadian temperature fluctuations on *B.*  
285 *anyana* but used only warmer days than nights [34,35]. While this is the more ecologically-  
286 relevant regime, in isolation, it did not allow identification of interactions between temperature  
287 and light phase. Like in those previous studies, we found that butterflies that developed under  
288 cooler nights, relative to those that developed under constant temperature of the same daily  
289 average (*i.e.* 27-19 versus 23 regimes), had faster development (Fig. 2) and larger eyespots (Fig.  
290 4), but mostly did not differ for the other traits under study (except female pupal mass; Fig. 3).  
291 Moreover, we showed that cooler nights speeded up development largely by shortening the  
292 duration of the post-feeding pupal phase (Fig. 2b). The explanation previously proposed to  
293 account for such effects on total development time was that *B. anyana* caterpillars eat mostly  
294 during the dark hours and assimilate those resources during light hours [34]. Cooler nights can  
295 presumably sustain higher activity levels and higher feeding rates, while warmer days might  
296 allow higher assimilation efficiency. Either or both of these could result in faster development.  
297 Relationships between temperature and food ingestion efficiency [41], as well as between

298 thermal stress and depletion of energy reserves [42] have been reported for different arthropods.  
299 Another factor that may explain different contributions of day and night temperatures relates to  
300 the open question of how often and when developing organisms “acquire information” about  
301 external environment [43,44]. Within windows of sensitivity during development (e.g.  
302 [24,32,45–47]), it remains unclear whether organisms assess environmental conditions  
303 continuously or at discrete time points. The “dominance” effect of the conditions experienced  
304 during the light hours on development time could reflect discrete sampling of the environment  
305 mainly occurring during that period of the day.

306

307 Our comparison between the two types of fluctuations allowed us to gain new insight on the  
308 combined effects of day and night temperatures on development time and eyespot size, two  
309 iconic examples of *B. anynana* seasonal plasticity. We found distinct types of interaction effects  
310 for the two traits. For development time, we found that the temperature experienced during the  
311 day had a stronger effect than the temperature experienced during the night. In the same way  
312 that individuals develop faster at 27°C relative to 19°C (Fig. 2a), individuals from 27-19 (*i.e.*  
313 day spent at 27°C) developed faster than those from 19-27 (day at 19°C) (Fig. 2c). On the other  
314 hand, we found that any period of the light-dark cycle spent at a warmer temperature lead to  
315 increased eyespot size, as is characteristic of development at warmer temperatures (Fig. 4a).  
316 Individuals developing under both types of temperature fluctuations had larger eyespots than  
317 those from the constant temperature of the same daily average (Fig. 4b).

318

### 319 **Independent effects of temperature on different traits that make up a plasticity syndrome**

320 Typically, seasonal forms differ in a suite of traits that respond to seasonably variable  
321 environmental conditions [36,39]. In the case of *B. anynana*, this thermal plasticity “syndrome”  
322 includes the traits monitored here, as well as others such as starvation resistance, longevity, and  
323 reproductive investment [23,39,48]. Supported also by laboratory data on correlated responses  
324 to selection on development time [40], it had been suggested that temperature affects  
325 development time directly, and it is the ensuing changes in development time that lead to

326 changes in other thermally plastic traits [29,35,40].

327

328 Indeed, butterflies developing at lower temperatures take longer to complete development and  
329 have smaller eyespots than those developing at warmer temperatures. However, within a  
330 thermal regime, the variation in development time between individuals, which can be of several  
331 days, did not correlate with eyespot size. This apparent case of the Simpson's paradox or Yule–  
332 Simpson effect [49] was true for our dataset and for data from other independent studies (Fig.  
333 5). These results suggest that temperature-induced changes in development time cannot account  
334 for temperature-induced changes in all other thermally plastic traits, and certainly not for  
335 changes in eyespot size seen under fluctuating temperatures, and argue for a more direct and  
336 trait-specific effect of temperature. Additional support for this comes from the different shapes  
337 of reaction norms of traits belonging to the thermal plasticity syndrome, and from the fact that  
338 manipulations of the ecdysone titres known to mediate this plasticity have trait-specific effects  
339 [33,50]. The trait-specific responses to environmental conditions are probably related to trait-  
340 specific windows of environmental sensitivity during development [32,46,47]

341

### 342 **Effects of circadian temperature fluctuations on development and evolution**

343 Experimental studies on different animal and plant systems have documented effects of day-  
344 night temperature fluctuations on both development (i.e. phenotype expression) and evolution  
345 (i.e. phenotype filtering by natural selection). Examples of the former include effects of day  
346 versus night temperature on the regulation of flowering time [51,52], and effects of circadian  
347 temperature fluctuations on various fitness related traits [53–57]. The close association between  
348 effects of light and of temperature on biological processes is further revealed in the overlap in  
349 sensing mechanisms for the two cues (e.g. role of phytochromes as thermosensors in  
350 *Arabidopsis* [58,59], or cryptochrome in *Drosophila* [54]), and also the observation that  
351 temperature, and not only light, can reset the circadian clock [60]. At the scale of inter-  
352 generation effects, evolution under different thermal regimes in natural and experimental  
353 populations has documented effects of circadian temperature fluctuations on a variety of

354 phenotypic traits including body size [56,57], as well as on allele frequencies [61].

355

356 Unlike most experimental studies of thermal plasticity, we addressed the effects of development  
357 under temperatures not held constant. Specifically, we studied potential interaction effects of  
358 fluctuating day and night temperatures on a suite of thermally plastic traits. Circadian  
359 fluctuating temperatures are undoubtedly closer to reality than constant temperatures, the same  
360 way that colder nights are closer to reality than warmer nights. This is the scenario under which  
361 organisms have evolved in natural populations, but is rarely the scenario under which animals  
362 are maintained or studied in the laboratory (but see e.g. [62]). In fact, even though exposure to  
363 temperature change can be used as a form of stress (e.g. [57,63]), it is possible that thermal  
364 constancy also constitutes a type of stress [64]. Whether temperature change is or not perceived  
365 as a stress capable of triggering stress responses likely depends on how abrupt (rather than  
366 gradual), how large, and how recurrent the change is [65]. Many studies of thermal stress use  
367 rather short exposures to extreme temperatures (e.g. [11,66]). Such temperature changes can  
368 affect different aspects of the organisms' biology, including developmental robustness [67] and  
369 various fitness-related traits [42]. It is unclear if the temperature changes, which typically  
370 fluctuate with the day and night cycle, can illicit any of the same type of physiological  
371 responses. It is even less well known how organisms integrate complex environmental  
372 information, such as that where multiple environmental factors change during the time it takes  
373 to complete development, and still produce coherent phenotypes for the various plastic traits  
374 [67,68]. Especially when environmental challenge includes a mismatch in what are the usual  
375 combinations of environmental factors, environment-by-environment effects are likely to have  
376 an important impact on how organisms deal with such challenge.

377

## 378 **Conclusions**

379 We found evidence for different types of combined effects for day- and night-time temperatures  
380 on a suite of thermally plastic traits associated with distinct seasonal strategies for survival and  
381 reproduction in *B. anynana* butterflies. While, for some traits, day and night temperatures seem

382 to have largely additive effects on phenotype expression, we also identified different types of  
383 non-additive effects. These included environmental dominance-like effects where one particular  
384 period of the circadian cycle or one particular extreme temperature had a relatively larger  
385 contribution to phenotype. Differences between traits reveal their independence in the response  
386 to temperature, which might relate to trait-specific windows of environmental sensitivity and/or  
387 trait-specific assessment of environmental conditions. Our study underscores the importance of  
388 understanding how organisms integrate complex environmental information towards a complete  
389 understanding of natural phenotypic variation and of the potential impact of environmental  
390 change thereon

391

392

### 393 **List of abbreviations**

394 GxE: gene-by-environment interactions

395 GxG: gene-by-gene interactions

396 ExE: environment-by-environment interactions

397 L1: first instar larvae

398

### 399 **Declarations**

#### 400 *Ethics approval and consent to participate*

401 Not applicable.

#### 402 *Consent for publication*

403 Not applicable.

#### 404 *Availability of data and material*

405 Raw data are available in Additional file 2.

#### 406 *Competing interests*

407 The authors declare that they have no competing interests.

#### 408 *Funding*

409 Portuguese science funding agency, Fundação para a Ciência e Tecnologia, FCT: PhD  
410 fellowship to Y.K.R. (SFRH/BD/114404/2016), and research grant to P.B. (PTDC/BIA-  
411 EVF/0017/2014). French research funding agency, Agence Nationale de la Recherche, ANR:  
412 Laboratory of Excellence TULIP, ANR-10-LABX-41 (support for D.D. and P.B.).  
413 French research centre, Centre National de la Recherche Scientifique, CNRS: International  
414 Associated Laboratory, LIA BEEG-B (support for D.D. and P.B.).

415

#### 416 **Authors' contributions**

417 Y.K.R. and P.B. conceived and designed the study; Y.K.R. performed the experiments and  
418 collected the data; F.A. developed a set of interactive Mathematica notebooks to collect wing  
419 phenotypic data; E.v.B. provided data on the extra constant thermal regimes and helped collect  
420 wing colour data; Y.K.R., E.v.B., and D.D. performed the statistical analyses; Y.K.R. and P.B.  
421 drafted the manuscript, with input from E.v.B. and D.D. All authors gave final approval for  
422 publication.

#### 423 **Acknowledgements**

424 We thank Elvira Lafuente for help with data analyses, Vicencio Oostra and Maaïke de Jong for  
425 access to their published data, and Carolina Peralta and Pedro Castanheira for help with animal  
426 husbandry.

427

#### 428 **Additional files**

429 Additional file 1: Effects of constant and fluctuating temperatures on eyespot colour rings.

430 Additional file 2: Dataset used in this study.

431

432



433 **References**

- 434 1. Beldade P, Mateus ARA, Keller RA. Evolution and molecular mechanisms of adaptive  
435 developmental plasticity. *Mol. Ecol.* 2011;20:1347–63.
- 436 2. Ghalambor CK, McKay JK, Carroll SP, Reznick DN. Adaptive versus non-adaptive  
437 phenotypic plasticity and the potential for contemporary adaptation in new environments. *Funct.*  
438 *Ecol.* 2007;21:394–407.
- 439 3. Nijhout HF. Development and evolution of adaptive polyphenisms. *Evol. Dev.* 2003;5:9–18.
- 440 4. Simpson SJ, Sword GA, Lo N. Polyphenism in insects. *Curr. Biol.* 2011;21:738–49.
- 441 5. Braendle C, Davis GK, Brisson JA, Stern DL. Wing dimorphism in aphids. *Heredity.*  
442 2006;97:192–9.
- 443 6. Brakefield PM. Seasonal polyphenism in butterflies and natural selection. *Trends Ecol. Evol.*  
444 1996;11:275–7.
- 445 7. Beldade P, Koops K, Brakefield PM. Developmental constraints versus flexibility in  
446 morphological evolution. *Nature.* 2002;416:844–7.
- 447 8. Windig JJ, Brakefield PM, Reitsma N, Wilson JGM. Seasonal polyphenism in the wild:  
448 survey of wing patterns in five species of *Bicyclus* butterflies in Malawi. *Ecol. Entomol.*  
449 1994;19:285–98.
- 450 9. Nylin S. Induction of diapause and seasonal morphs in butterflies and other insects: Knowns,  
451 unknowns and the challenge of integration. *Physiol. Entomol.* 2013;38:96–104.
- 452 10. Saunders DS. Insect photoperiodism: Effects of temperature on the induction of insect  
453 diapause and diverse roles for the circadian system in the photoperiodic response. *Entomol. Sci.*  
454 2014;17:25–40.
- 455 11. Fischer K, Dierks A, Franke K, Geister TL, Liszka M, Winter S, et al. Environmental effects  
456 on temperature stress resistance in the tropical butterfly *Bicyclus anynana*. *PLoS One.*  
457 2010;5:e15284.
- 458 12. Ørsted M, Schou MF, Kristensen TN. Biotic and abiotic factors investigated in two  
459 *Drosophila* species – evidence of both negative and positive effects of interactions on  
460 performance. *Sci. Rep. Nature.* 2017;7:40132.
- 461 13. Ingleby FC, Hunt J, Hosken DJ. The role of genotype-by-environment interactions in sexual  
462 selection. *J. Evol. Biol.* 2010;2031–45.
- 463 14. Lazzaro BP, Flores HA, Lorigan JG, Yourth CP. Genotype-by-environment interactions and  
464 adaptation to local temperature affect immunity and fecundity in *Drosophila melanogaster*.  
465 *PLoS Pathog.* 2008;4:1–9.
- 466 15. Samir P, Rahul, Slaughter JC, Link AJ. Environmental interactions and epistasis are  
467 revealed in the proteomic responses to complex stimuli. *PLoS One.* 2015;10:1–22.
- 468 16. Doust AN, Lukens L, Olsen KM, Mauro-Herrera M, Meyer A, Rogers K. Beyond the single

- 469 gene: How epistasis and gene-by-environment effects influence crop domestication. *Proc. Natl.*  
470 *Acad. Sci.* 2014;111:6178–83.
- 471 17. Arnqvist G, Dowling DK, Eady P, Gay L, Tregenza T, Tuda M, et al. Genetic architecture  
472 of metabolic rate: Environment specific epistasis between mitochondrial and nuclear genes in an  
473 insect. *Evolution.* 2010;64:3354–63.
- 474 18. Chi CA, Clark DA, Lee S, Biron D, Luo L, Gabel C V., et al. Temperature and food mediate  
475 long-term thermotactic behavioral plasticity by association-independent mechanisms in *C.*  
476 *elegans*. *J. Exp. Biol.* 2007;210:4043–52.
- 477 19. Saastamoinen M, Brommer JE, Brakefield PM, Zwaan BJ. Quantitative genetic analysis of  
478 responses to larval food limitation in a polyphenic butterfly indicates environment and trait-  
479 specific effects. *Ecol. Evol.* 2013;3:3565–75.
- 480 20. Fischer S, Bohn L, Oberhammer E, Wikström C, Taborsky B. Divergence of social  
481 trajectories is triggered interactively by early social and ecological experience. *Proc. Natl. Acad.*  
482 *Sci.* 2016;1–8.
- 483 21. Stoehr AM, Wojan EM. Multiple cues influence multiple traits in the phenotypically plastic  
484 melanization of the cabbage white butterfly. *Oecologia.* Springer Berlin Heidelberg;  
485 2016;182:691–701.
- 486 22. Saxon AD, O'Brien EK, Bridle JR. Temperature fluctuations during development reduce  
487 male fitness and may limit adaptive potential in tropical rainforest *Drosophila*. *J. Evol. Biol.*
- 488 23. Brakefield PM, Beldade P, Zwaan BJ. The African butterfly *Bicyclus anynana*: A model for  
489 evolutionary genetics and evolutionary developmental biology. *Cold Spring Harb. Protoc.*  
490 2009;4.
- 491 24. Monteiro A, Tong X, Bear A, Liew SF, Bhardwaj S, Wasik BR, et al. Differential  
492 Expression of Ecdysone Receptor Leads to Variation in Phenotypic Plasticity across Serial  
493 Homologs. *PLoS Genet.* 2015;11:1–20.
- 494 25. Beldade P, Peralta CM. Developmental and evolutionary mechanisms shaping butterfly  
495 eyespots. *Curr. Opin. Insect Sci.* 2017;19:22–9.
- 496 26. Brakefield PM, Larsen TB. The evolutionary significance of dry and wet season forms in  
497 some tropical butterflies. *Biol. J. Linn. Soc.* 1984;22:1–12.
- 498 27. van Bergen E, Barlow HS, Brattström O, Griffiths H, Kodandaramaiah U, Osborne CP, et  
499 al. The stable isotope ecology of mycalesine butterflies: implications for plant–insect co-  
500 evolution. *Funct. Ecol.* 2016;30:1936–46.
- 501 28. Brakefield PM, Reitsma N. Phenotypic plasticity, seasonal climate and the population  
502 biology of *Bicyclus* butterflies (Satyridae) in Malawi. *Ecol. Entomol.* 1991;16:291–303.
- 503 29. Brakefield PM, Frankino WA. Polyphenisms in Lepidoptera: multidisciplinary approaches  
504 to studies of evolution and development. *Phenotypic Plast. insects Mech. consequences.*  
505 2006;121–52.

- 506 30. Lyytinen A, Brakefield PM, Lindstrom L, Mappes J. Does predation maintain eyespot  
507 plasticity in *Bicyclus anynana*? *Proc. R. Soc. B Biol. Sci.* 2004;271:279–83.
- 508 31. Prudic KL, Stoehr AM, Wasik BR, Monteiro A. Eyespots deflect predator attack increasing  
509 fitness and promoting the evolution of phenotypic plasticity. *Proc. R. Soc. B Biol. Sci.*  
510 2014;282:20141531–20141531.
- 511 32. Kooi RE, Brakefield PM. The critical period for wing pattern induction in the polyphenic  
512 tropical butterfly *Bicyclus anynana* (Satyriinae). *J. Insect Physiol. Pergamon.* 1999;45:201–12.
- 513 33. Oostra V, Mateus ARA, Burg KRL Van Der, Piessens T, Eijk M Van, Brakefield PM, et al.  
514 Ecdysteroid Hormones Link the Juvenile Environment to Alternative Adult Life Histories in a  
515 Seasonal Insect. *Am. Nat.* 2014;184:E79–92.
- 516 34. Brakefield PM, Mazzotta V. Matching field and laboratory environments: effects of  
517 neglecting daily temperature variation on insect reaction norms. *J. Evol. Biol.* 1995;8:559–73.
- 518 35. Brakefield PM, Kesbeke F. Genotype-environment interactions for insect growth in constant  
519 and fluctuating temperature regimes. *Proc. R. Soc. B Biol. Sci.* 1997;264:717–23.
- 520 36. van Bergen E, Osbaldeston D, Kodandaramaiah U, Brattström O, Aduse-Poku K, Brakefield  
521 PM. Conserved patterns of integrated developmental plasticity in a group of polyphenic tropical  
522 butterflies. *BMC Evol. Biol.* 2017;17:59.
- 523 37. R Core Team. R: A language and environment for statistical computing. Vienna, Austria: R  
524 Foundation for Statistical Computing; 2016. Available from: <https://www.r-project.org/>
- 525 38. Benjamini Y, Hochberg Y. Controlling the False Discovery Rate: A Practical and Powerful  
526 Approach to Multiple Testing. *J. R. Stat. Soc. Ser. B.* 1995;57:289–300.
- 527 39. Oostra V, de Jong MA, Invergo BM, Kesbeke F, Wende F, Brakefield PM, et al. Translating  
528 environmental gradients into discontinuous reaction norms via hormone signalling in a  
529 polyphenic butterfly. *Proc. R. Soc. B Biol. Sci.* 2011;278:789–97.
- 530 40. Zijlstra WG, Steigenga MJ, Koch PB, Zwaan BJ, Brakefield PM. Butterfly Selected Lines  
531 Explore the Hormonal Basis of Interactions between Life Histories and Morphology. *Am. Nat.*  
532 2004;163:E76–87.
- 533 41. Rall BC, Vucic-Pestic O, Ehnes RB, Emmerson M, Brose U. Temperature, predator-prey  
534 interaction strength and population stability. *Glob. Chang. Biol.* 2010;16:2145–57.
- 535 42. Klepsatel P, Gálíková M, Xu Y, Kühnlein RP. Thermal stress depletes energy reserves in  
536 *Drosophila*. *Sci. Rep. Nature Publishing Group;* 2016;6:33667.
- 537 43. McNamara J. Phenotypic plasticity in fluctuating environments: consequences of the lack of  
538 individual optimization. *Behav. Ecol.* 1998;9:642–8.
- 539 44. Frankenhuis WE, Panchanathan K. Balancing sampling and specialization: an adaptationist  
540 model of incremental development. *Proc. R. Soc. B Biol. Sci.* 2011;278:3558–65.
- 541 45. Frankenhuis WE, Panchanathan K. Individual Differences in Developmental Plasticity May  
542 Result From Stochastic Sampling. *Perspect. Psychol. Sci.* 2011;6:336–47.

- 543 46. Fawcett TW, Frankenhuis WE. Adaptive explanations for sensitive windows in  
544 development. *Front. Zool. BioMed Central Ltd*; 2015;12:S3.
- 545 47. Panchanathan K, Frankenhuis WE. The evolution of sensitive periods in a model of  
546 incremental development. *Proc. R. Soc. London B Biol. Sci.* 2016;283.
- 547 48. Fischer K, Brakefield PM, Zwaan BJ. Plasticity in butterfly egg size: Why larger offspring  
548 at lower temperatures? *Ecology.* 2003;84:3138–47.
- 549 49. Hernán MA, Clayton D, Keiding N. The simpson’s paradox unraveled. *Int. J. Epidemiol.*  
550 2011;40:780–5.
- 551 50. Mateus ARA, Marques-Pita M, Oostra V, Lafuente E, Brakefield PM, Zwaan BJ, et al.  
552 Adaptive developmental plasticity: compartmentalized responses to environmental cues and to  
553 corresponding internal signals provide phenotypic flexibility. *BMC Biol.* 2014;12:97.
- 554 51. Blanchard MG, Runkle ES. The influence of day and night temperature fluctuations on  
555 growth and flowering of annual bedding plants and greenhouse heating cost predictions.  
556 *HortScience.* 2011;46:599–603.
- 557 52. Yin X, Kropff MJ, Goudriaan J. Differential Effects of Day and Night Temperature on  
558 Development to Flowering in Rice. *Ann. Bot.* 1996;77:203–13.
- 559 53. Clarke DN, Zani PA. Effects of night-time warming on temperate ectotherm reproduction:  
560 potential fitness benefits of climate change for side-blotched lizards. *J. Exp. Biol.*  
561 2012;215:1117–27.
- 562 54. Harper REF, Ogueta M, Dayan P, Stanewsky R, Albert JT. Light dominates peripheral  
563 circadian oscillations in *Drosophila melanogaster* during sensory conflict. *J. Biol. Rhythms.*  
564 2017;32:1–10.
- 565 55. Kramarz P, Malek D, Naumiec K, Zajac K, Drobnik SM. Response of Development and  
566 Body Mass to Daily Temperature Fluctuations: a Study on *Tribolium castaneum*. *Evol. Biol.*  
567 2016;43:356–67.
- 568 56. Adrian GJ, Czarnoleski M, Angilletta MJ. Flies evolved small bodies and cells at high or  
569 fluctuating temperatures. *Ecol. Evol.* 2016;6:7991–6.
- 570 57. Czarnoleski M, Cooper BS, Kierat J, Angilletta MJ. Flies developed small bodies and small  
571 cells in warm and in thermally fluctuating environments. *J. Exp. Biol.* 2013;216:2896–901.
- 572 58. Jung J-H, Domijan M, Klose C, Biswas S, Ezer D, Gao M, et al. Phytochromes function as  
573 thermosensors in *Arabidopsis*. *Science.* 2016;354:886–9.
- 574 59. Legris M, Klose C, Burgie ES, Rojas CCR, Neme M, Hiltbrunner A, et al. Phytochrome B  
575 integrates light and temperature signals in *Arabidopsis*. *Science.* 2016;354:897–900.
- 576 60. Chu F, Qiu JF, Tao H, Li X, Shu MY, Liu HJ, et al. Impact of cyclical changes in  
577 temperature on circadian clock genes expression in *Bombyx BmN* cells. *Arch. Insect Biochem.*  
578 *Physiol.* 2016;91:175–86.
- 579 61. Tobler R, Hermisson J, Schlötterer C. Parallel trait adaptation across opposing thermal

- 580 environments in experimental *Drosophila melanogaster* populations. *Evolution* (N. Y).  
581 2015;69:1745–59.
- 582 62. Kong JD, Axford JK, Hoffmann AA, Kearney MR. Novel applications of thermocyclers for  
583 phenotyping invertebrate thermal responses. *Methods Ecol. Evol.* 2016;7:1201–8.
- 584 63. Wong BBM, Candolin U. Behavioral responses to changing environments. *Behav. Ecol.*  
585 2015;26:665–73.
- 586 64. Schulte PM. What is environmental stress? Insights from fish living in a variable  
587 environment. *J. Exp. Biol.* 2014;217:23–34.
- 588 65. Kingsolver JG, MacLean HJ, Goddin SB, Augustine KE. Plasticity of upper thermal limits  
589 to acute and chronic temperature variation in *Manduca sexta* larvae. *J. Exp. Biol.*  
590 2016;219:1290–4.
- 591 66. Colinet H, Sinclair BJ, Vernon P, Renault D. Insects in Fluctuating Thermal Environments.  
592 *Annu. Rev. Entomol.* 2015;60:123–40.
- 593 67. Ketola T, Kellermann VM, Loeschcke V, López-Sepulcre A, Kristensen TN. Does  
594 environmental robustness play a role in fluctuating environments? *Evolution.* 2014;68:587–94.
- 595 68. Chevin LM, Lande R. Evolution of environmental cues for phenotypic plasticity. *Evolution.*  
596 2015;69:2767–75.
- 597  
598  
599  
600

601 **Figure legends**

602

603 **Fig. 1. Treatments and wing pigmentation phenotypes.**

604 (a) Thermal regimes with constant and fluctuating temperatures in association to the light-dark  
605 circadian cycle. (b) Examples of hindwings (ventral surface) from female and male adults from  
606 the different constant temperature treatments. (c) Section of a female hindwing (region  
607 corresponding to rectangle in panel (b) where landmarks (white circles) defined two contiguous  
608 transects (white dashed line) passing through the centre of the fifth eyespot. The proximal  
609 portion of the transect (solid line) indicates the approximate region used to phenotype the  
610 brightness of background.

611

612 **Fig. 2. Effects of constant and fluctuating temperatures on development time.**

613 Total development time (L1 to adult) and duration of different developmental stages (larvae,  
614 pre-pupae, pupae) for females and males developing under constant (a, b) or fluctuating (c, d)  
615 temperatures. Panels (a) and (c) represent the proportion of adult eclosions since the start of the  
616 experiment. Each line corresponds to the individuals of all four replicates for each treatment.  
617 There were significant differences (Coxph with  $df=2$  and  $p<0.005$  in all cases) between  
618 constant temperature treatments in (a) ( $\chi^2=245.3$  for females,  $\chi^2=202.0$  for males), and between  
619 the three types of treatments of same daily mean in (c) ( $\chi^2=10.6$  for females,  $\chi^2=16.8$  for males).  
620 Letters next to treatment legend illustrate whether pairs of treatments are significantly different  
621 (different letters) or not (same letter), cf. glth post-hoc test. Panels (b) and (d) correspond to the  
622 duration of different developmental stages. Constant temperature treatments in (b) differed in  
623 duration of all developmental stages in males (larvae:  $\chi^2=171.2$ ; pre-pupae:  $\chi^2=61.1$ ;  
624 pupae:  $\chi^2=170.0$ ) and females (larvae:  $\chi^2=195.9$ ; pre-pupae:  $\chi^2=104.2$ ; pupae:  $\chi^2=203.6$ ; Coxph  
625 with  $df=2$  and  $p<0.001$  for all cases). Fluctuating temperature treatments in (d) differed  
626 significantly for the duration of the pupal stage for females (pupae:  $\chi^2=31.0$ ,  $df=2$ ,  $p<0.001$ )  
627 and males (larvae:  $\chi^2=6.7$ ,  $p<0.03$ ; pupae:  $\chi^2=38.8$ ,  $p<0.001$ ; Coxph with  $df=2$ ) but none of the  
628 other stages (females larvae:  $\chi^2=4.3$ ; pre-pupae:  $\chi^2=4.2$  and males pre-pupae:  $\chi^2=0.5$ ,  $df=2$ ,  
629  $p>0.05$ ).

630

631 **Fig. 3. Effects of constant and fluctuating temperatures on body size.**

632 Pupal mass and wing area of adult butterflies for females and males developed under constant  
633 (a-b) and fluctuating (c-d) temperatures. Each dot corresponds to one individual (all replicates  
634 plotted together) and the red triangles are median values. We found significant differences in  
635 pupal mass between constant temperature treatments (a) for both females ( $F=4.0$ ,  $df=2$ ,  $p=0.02$ )  
636 and males ( $F=3.1$ ,  $df=2$ ,  $p=0.04$ ), and between treatments of same daily mean temperature (c)

637 for females ( $F=7.5$ ,  $df=2$ ,  $p<0.001$ ) but not males ( $F=0.1$ ,  $df=2$ ,  $p=0.91$ ). We found significant  
638 differences in adult wing area between constant temperature treatments (**b**) for females ( $F=16.1$ ,  
639  $df=2$ ,  $p<0.001$ ) and males ( $F=17.7$ ,  $df=2$ ,  $p<0.001$ ), but not between treatments of same daily  
640 mean temperature (**d**) for females ( $F=0.6$ ,  $df=2$ ,  $p=0.56$ ) or males ( $F=0.9$ ,  $df=2$ ,  $p=0.40$ ). *ns*  
641 refers to non-significant differences between treatments. When there was a significant  
642 difference between treatments, letters above treatments illustrate whether they are significantly  
643 different (different letters) or not (same letter), *cf.* glth post-hoc test.

644

645 **Fig. 4. Effects of constant and fluctuating temperatures on wing pigmentation.**

646 The background colour and relative eyespot size from females and males developed under  
647 constant (**a,c**) and fluctuating temperatures (**b,d**). Each dot corresponds to one individual (all  
648 replicates plotted together) and the red triangles are median values. We found differences in  
649 brightness of wing background colour between constant temperature treatments (**a**) for males  
650 ( $F=33.8$ ,  $df=2$ ,  $p<0.001$ ) but not females ( $F=2.1$ ,  $df=2$ ,  $p=0.12$ ), and no significant differences  
651 between treatments of same daily mean temperature (**c**) for either sex ( $F=0.9$ ,  $df=2$ ,  $p=0.30$  for  
652 males and females  $F=0.6$ ,  $df=2$ ,  $p=0.40$ ). We found significant differences (ANOVA,  $df=2$ ,  
653  $p<0.001$  in all cases) in relative eyespot size between constant temperature treatments (b) for  
654 females ( $F=223.5$ ) and males ( $F=315.3$ ), and also between treatments with the same daily mean  
655 (**d**) for females ( $F=14.6$ ) and males ( $F=25.6$ ). *ns* refers to non-significant differences between  
656 treatments. When there was a significant difference between treatments, Letters above  
657 treatments illustrate whether they are significantly different (different letters) or not (same  
658 letter), *cf.* glth post-hoc test. (**e**) Representation of mean RGB colour for the pixels of the wing  
659 background, as well as relative area and colours of eyespot rings from different thermal regimes  
660 (see also Additional file 1).

661

662 **Fig. 5. Correlation between relative eyespot size and development time.**

663 Relationship between development time and relative eyespot size for females and males from  
664 our regimes with constant temperatures (**a**) or with daily mean temperature of 23°C (**b**), as well  
665 as data from published work on *B. anynana* using constant temperatures (**c**). Each dot  
666 corresponds to one individual and all replicates are plotted together, separately for females and  
667 males. Lines correspond to the best fit line: same colour as dots for relationships for data points  
668 of the different thermal regime, and black for relationship across all data points. Spearman's  
669 rank correlation coefficient (Spearman rho) test showed a significant negative correlation when  
670 data points from all treatments were considered together (black line): (**a**)  $\rho=-0.85$  for females  
671 and  $\rho=-0.88$  for males ( $p<0.001$  for both), (**b**)  $\rho=-0.19$  ( $p=0.08$ ) for males and  $\rho=-0.28$  for  
672 females ( $p=0.001$ ), (**c**)  $\rho=-0.87$  for males and  $\rho=-0.85$  females ( $p<0.001$  for both). For the  
673 correlations within treatments, *rho* and corresponding *p*-values are given in the figure.

(a)

| Treatment | 12hr light | 12hr dark |
|-----------|------------|-----------|
| 19        | 19°C       | 19°C      |
| 23        | 23°C       | 23°C      |
| 27        | 27°C       | 27°C      |
| 27-19     | 27°C       | 19°C      |
| 19-27     | 19°C       | 27°C      |

(b)

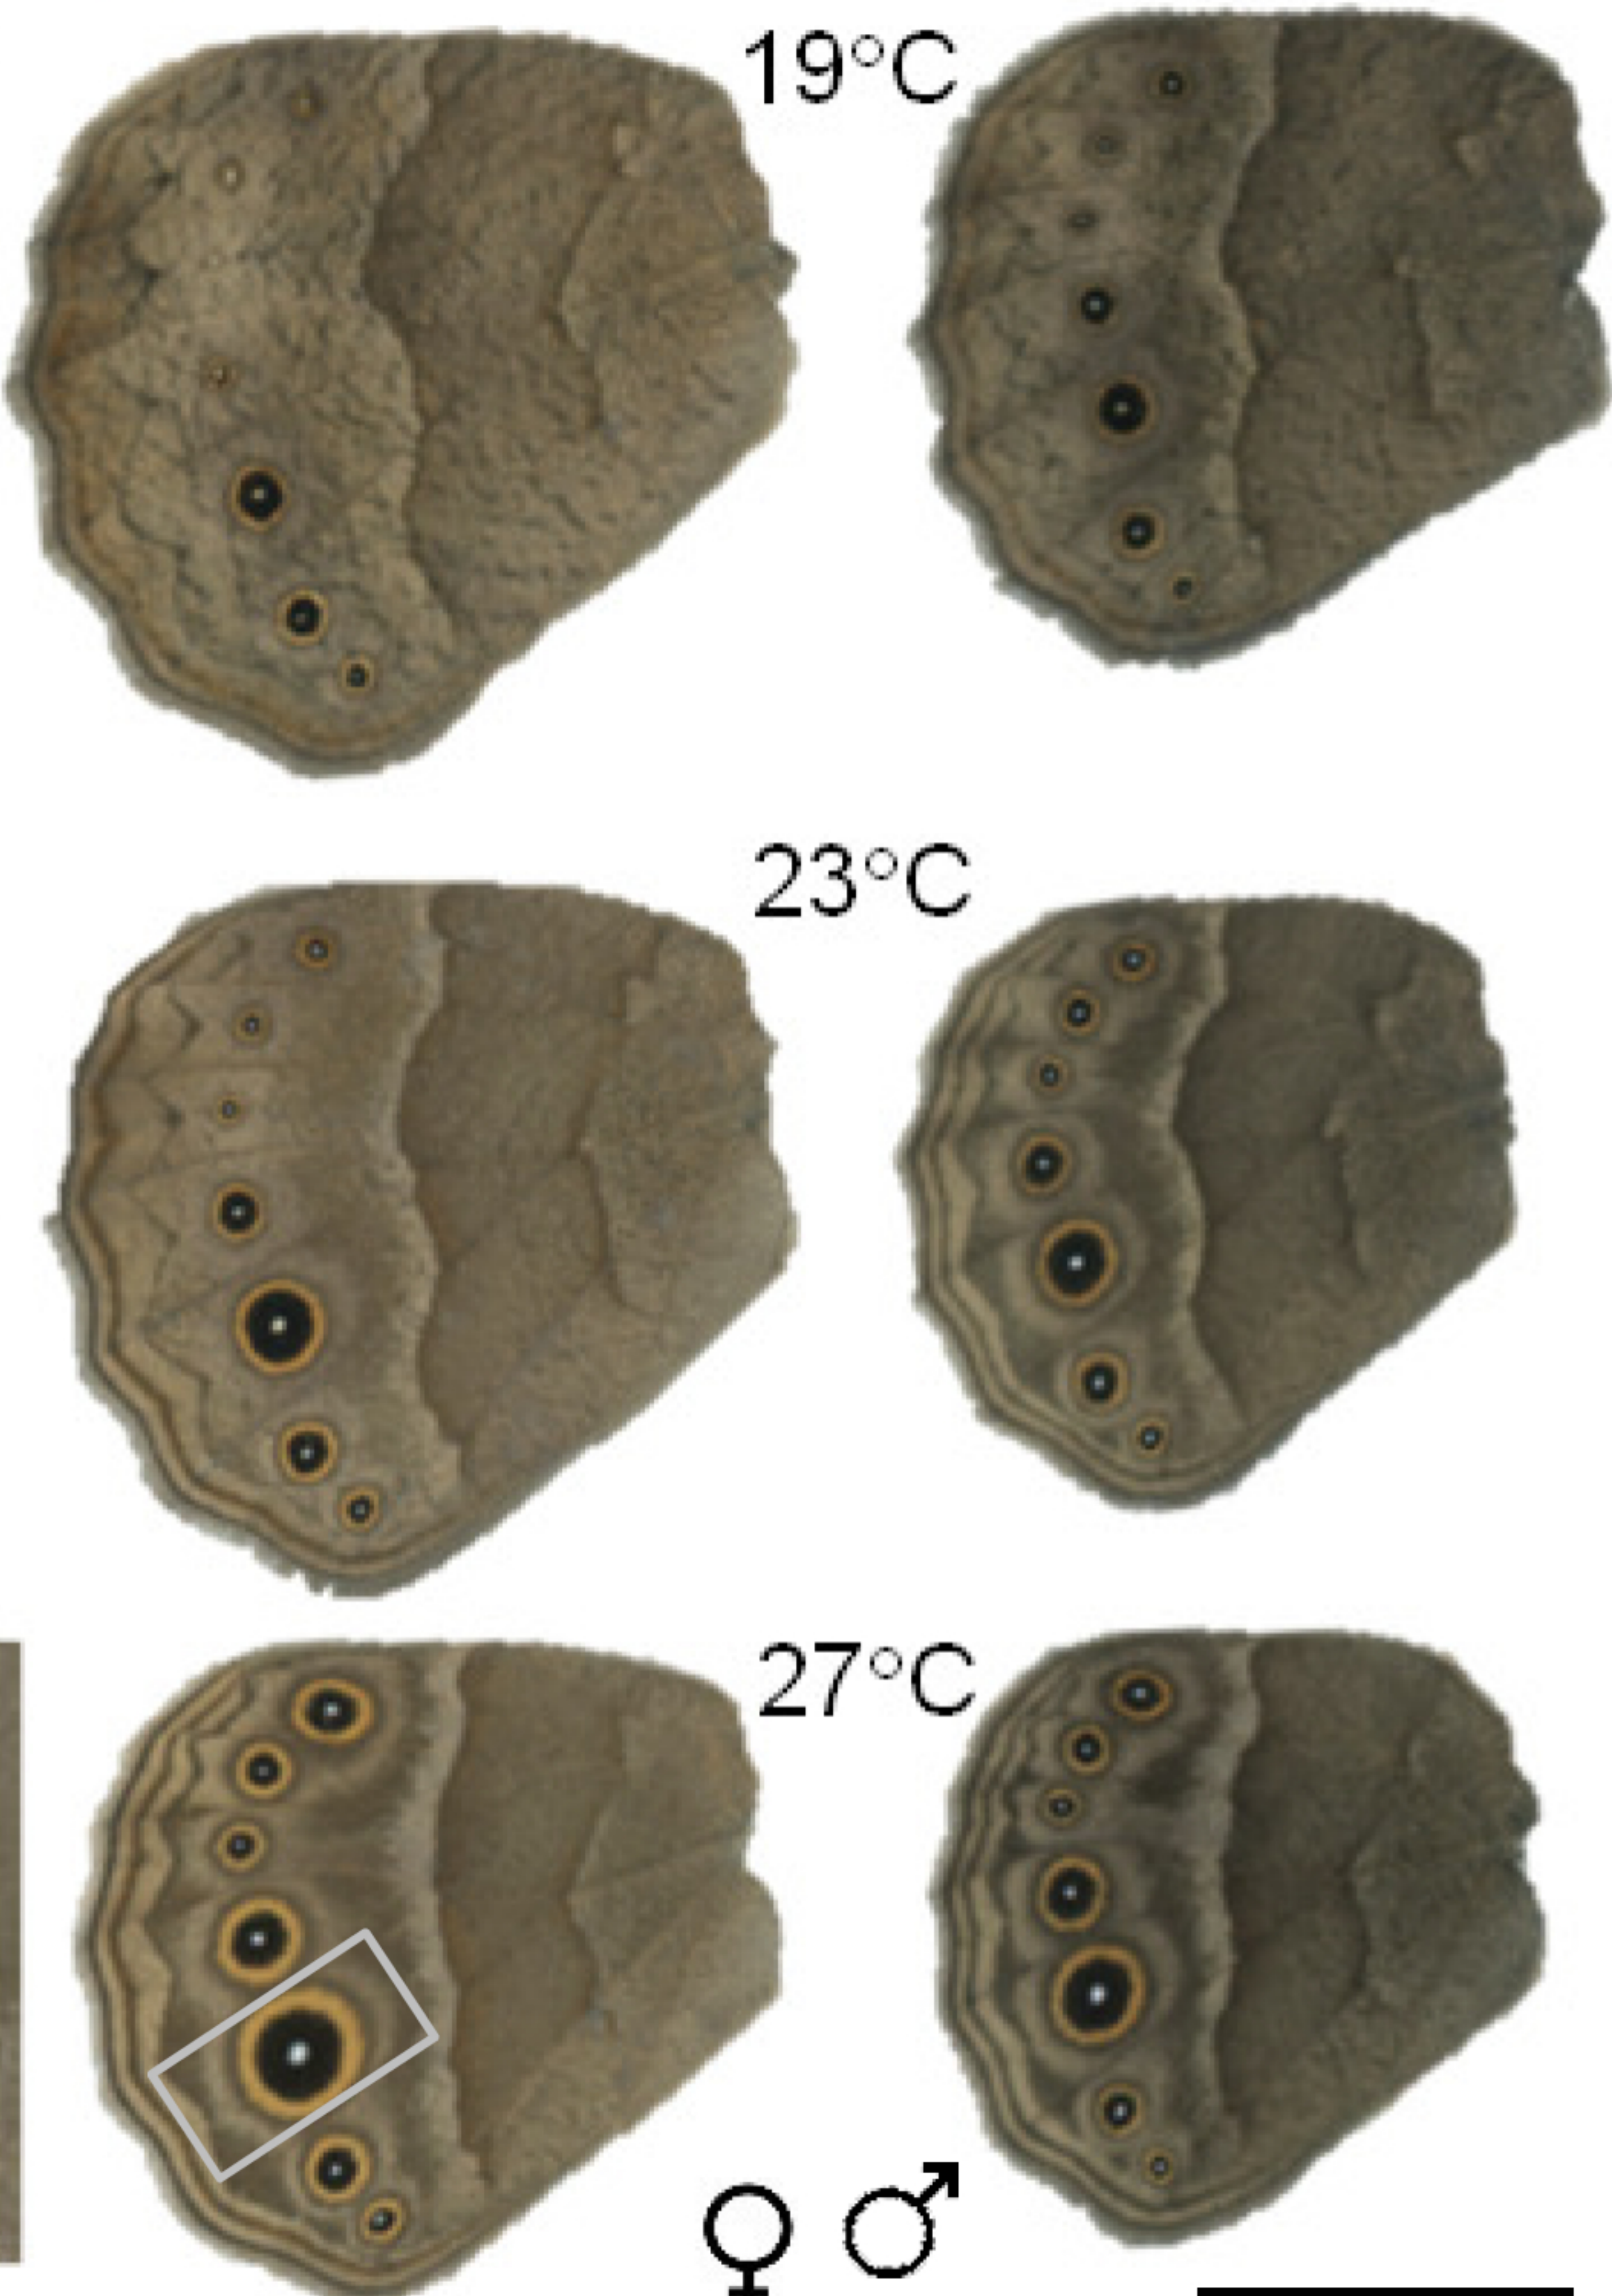

(c)

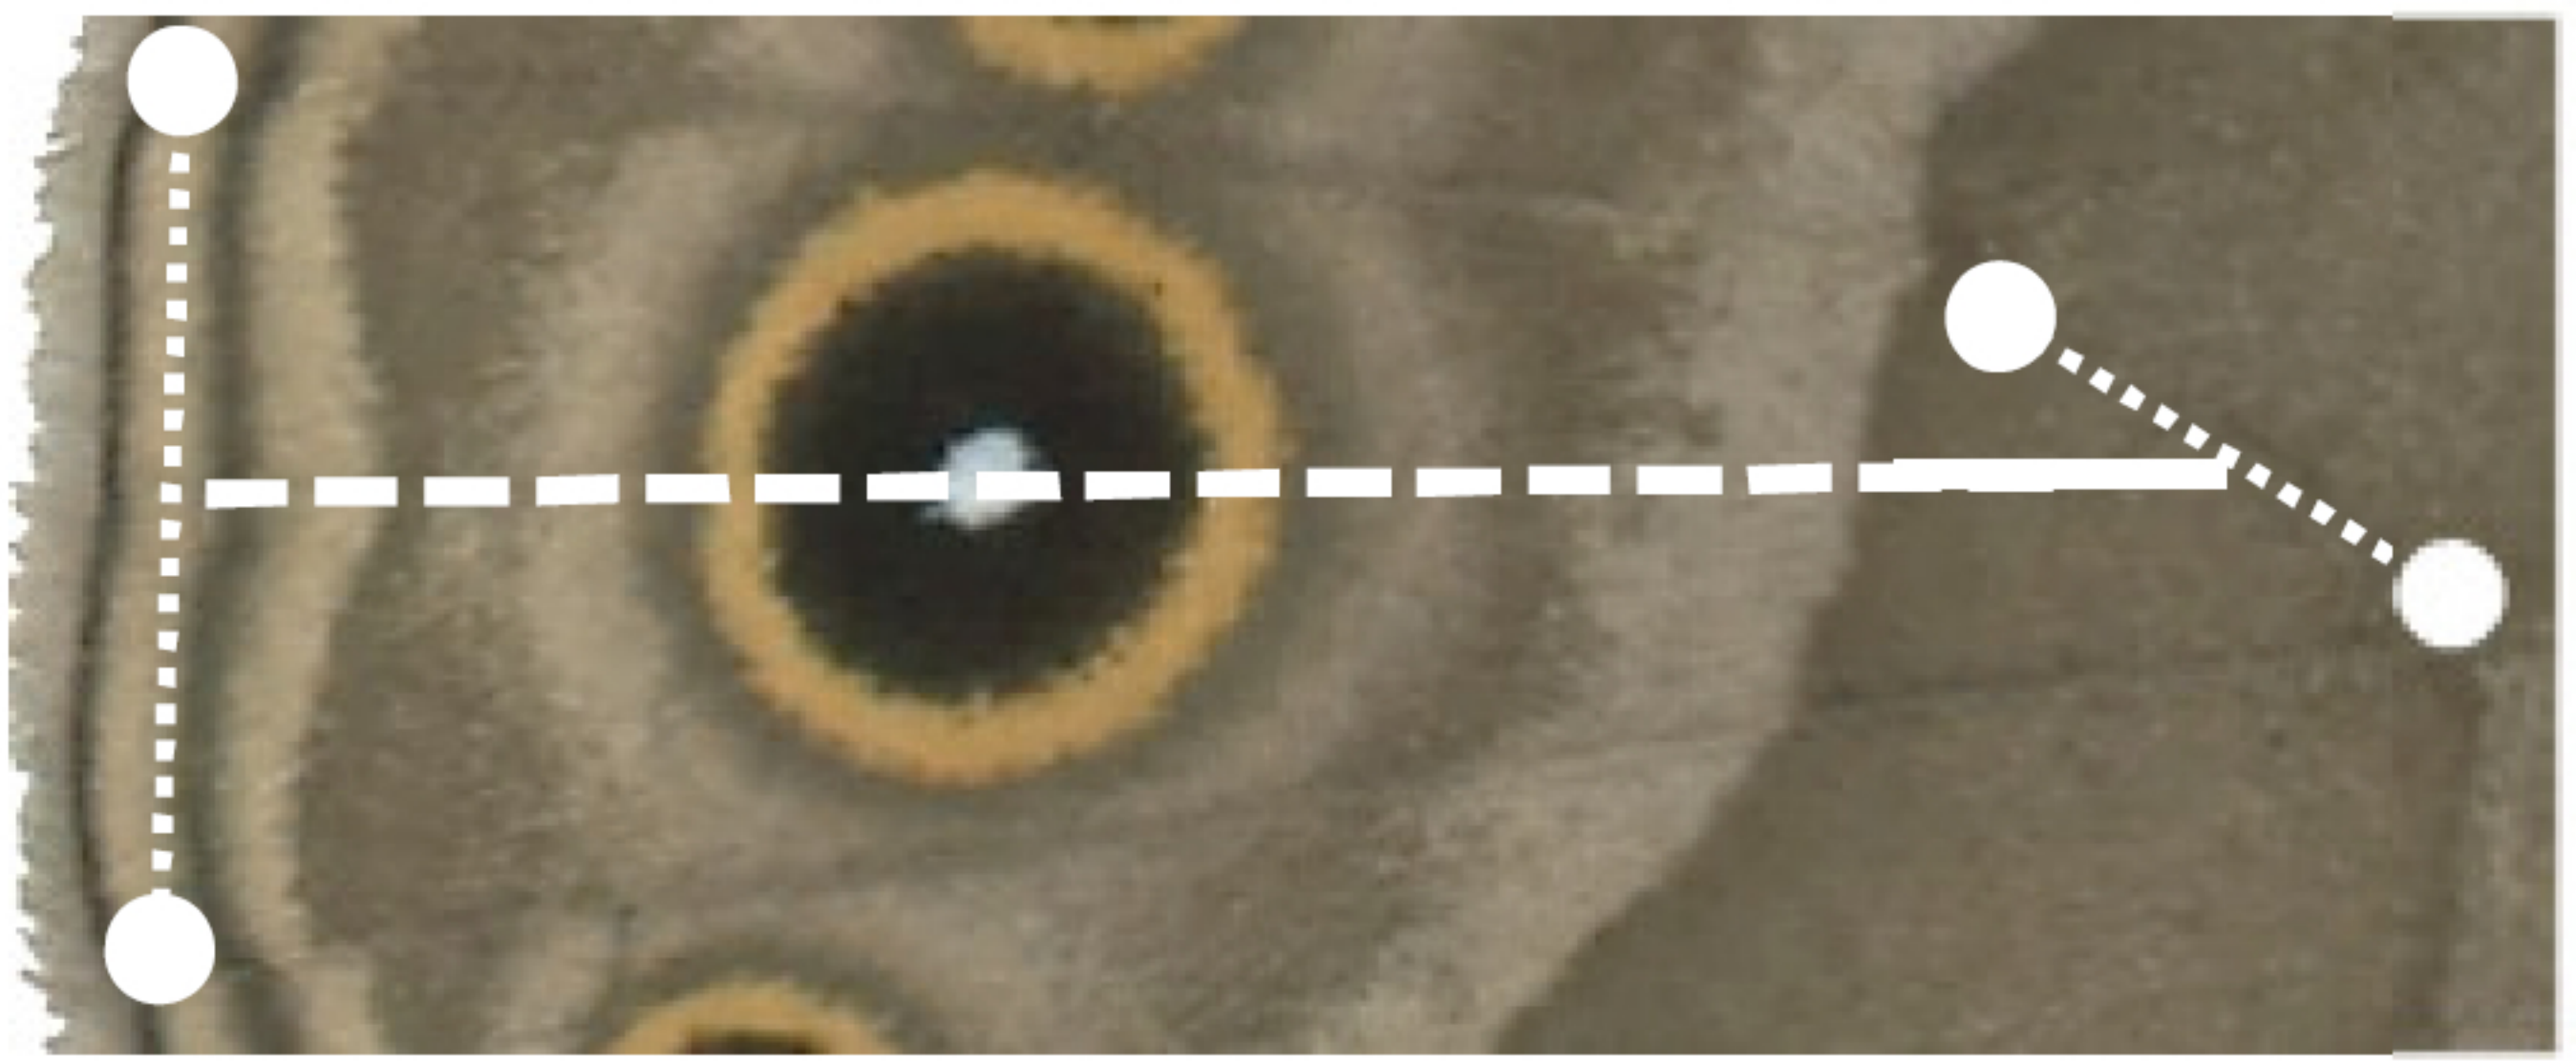

<https://doi.org/10.1101/202208>  
certified by peer review) is the author/funder. All rights reserved. No reuse allowed without permission.

1 cm



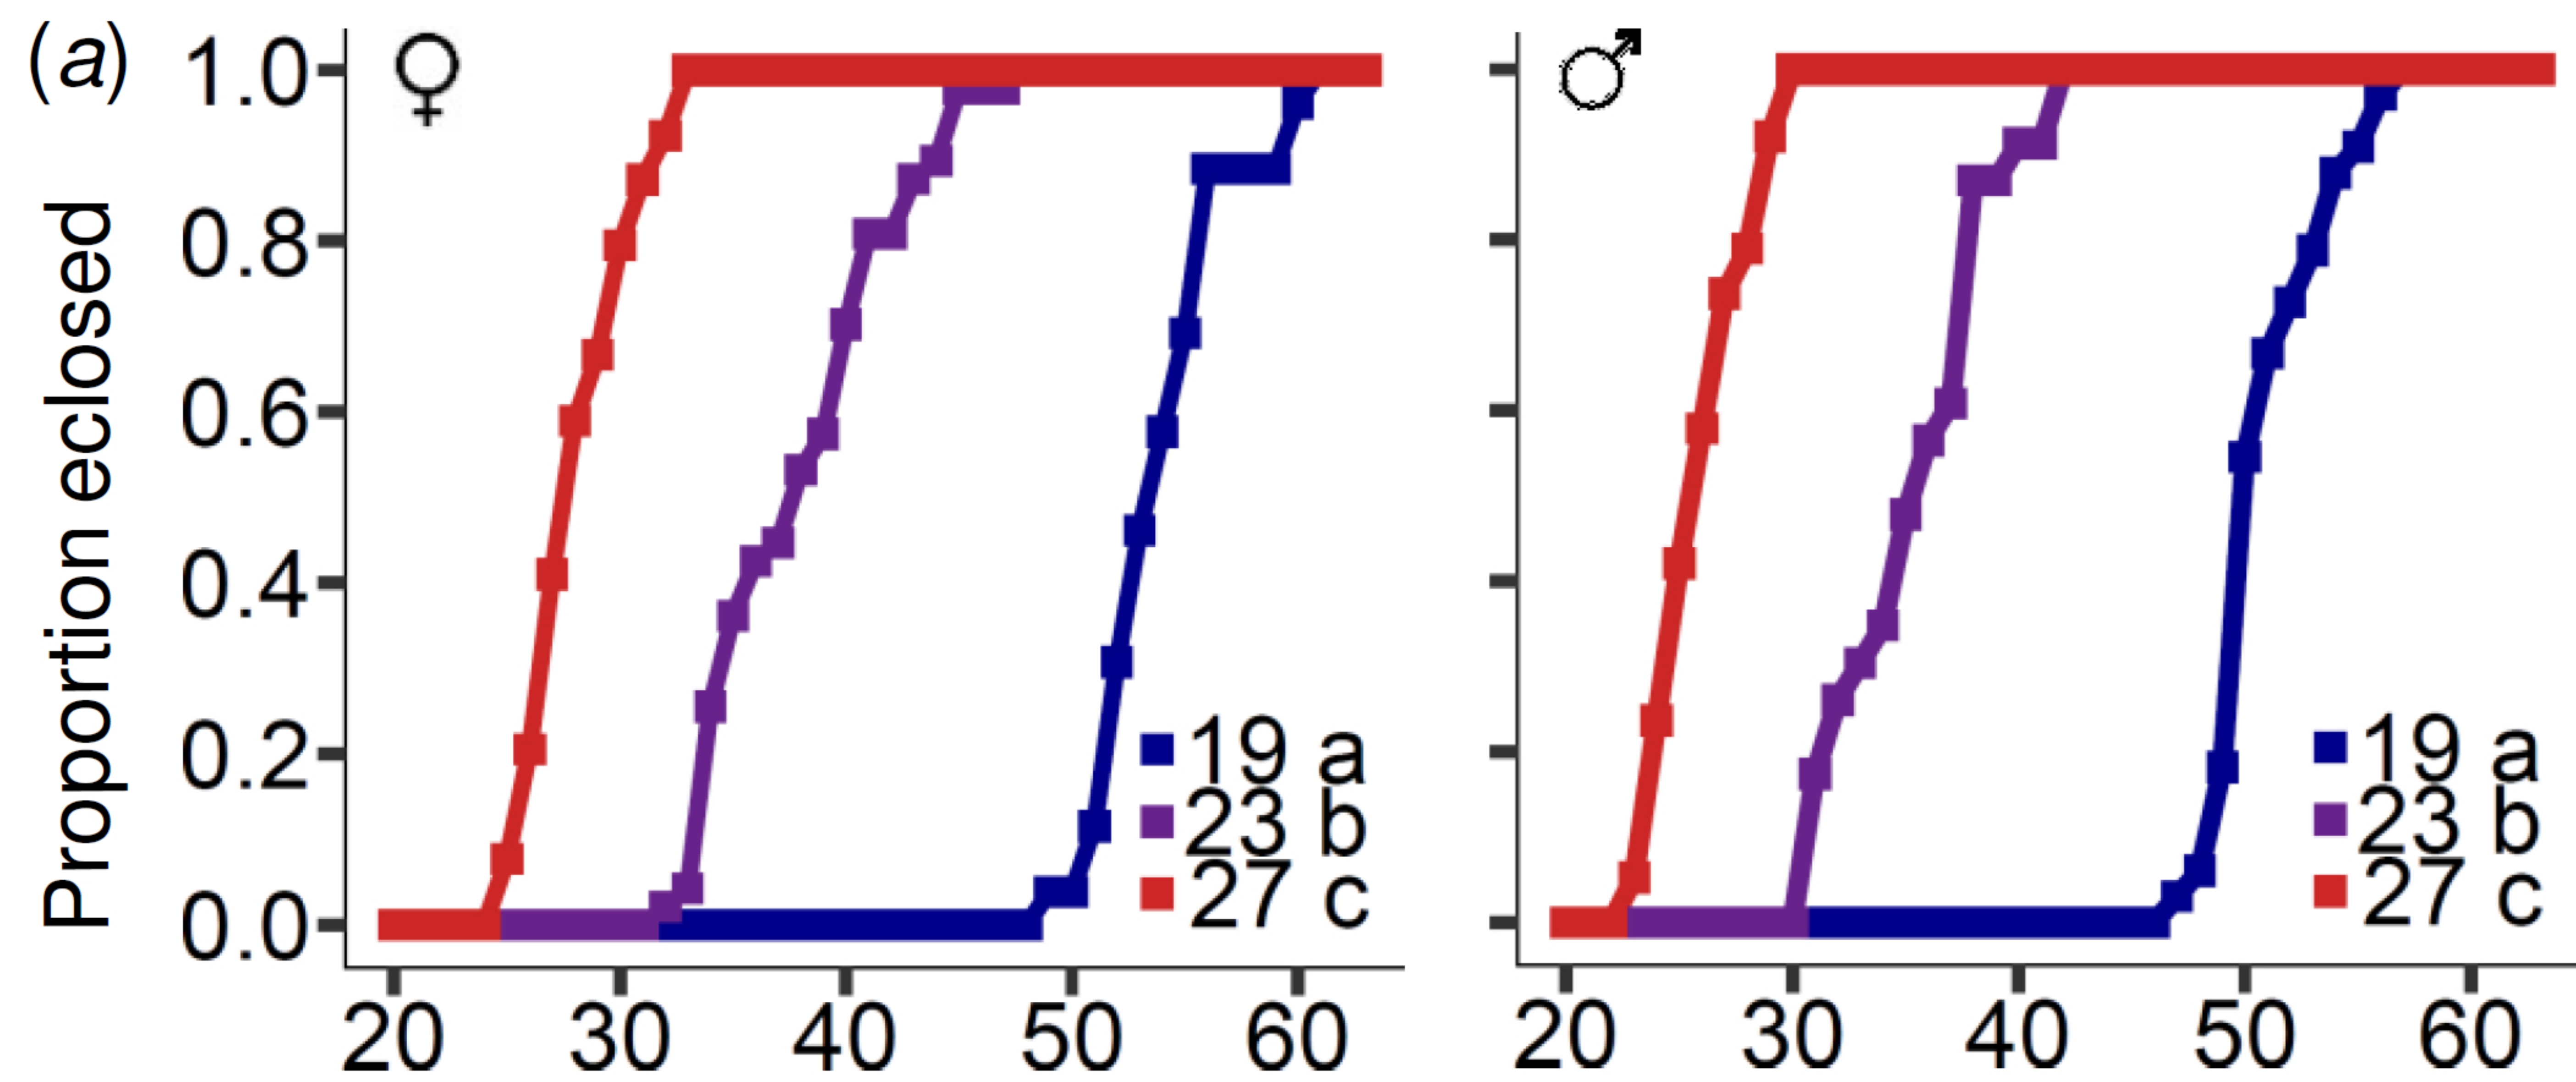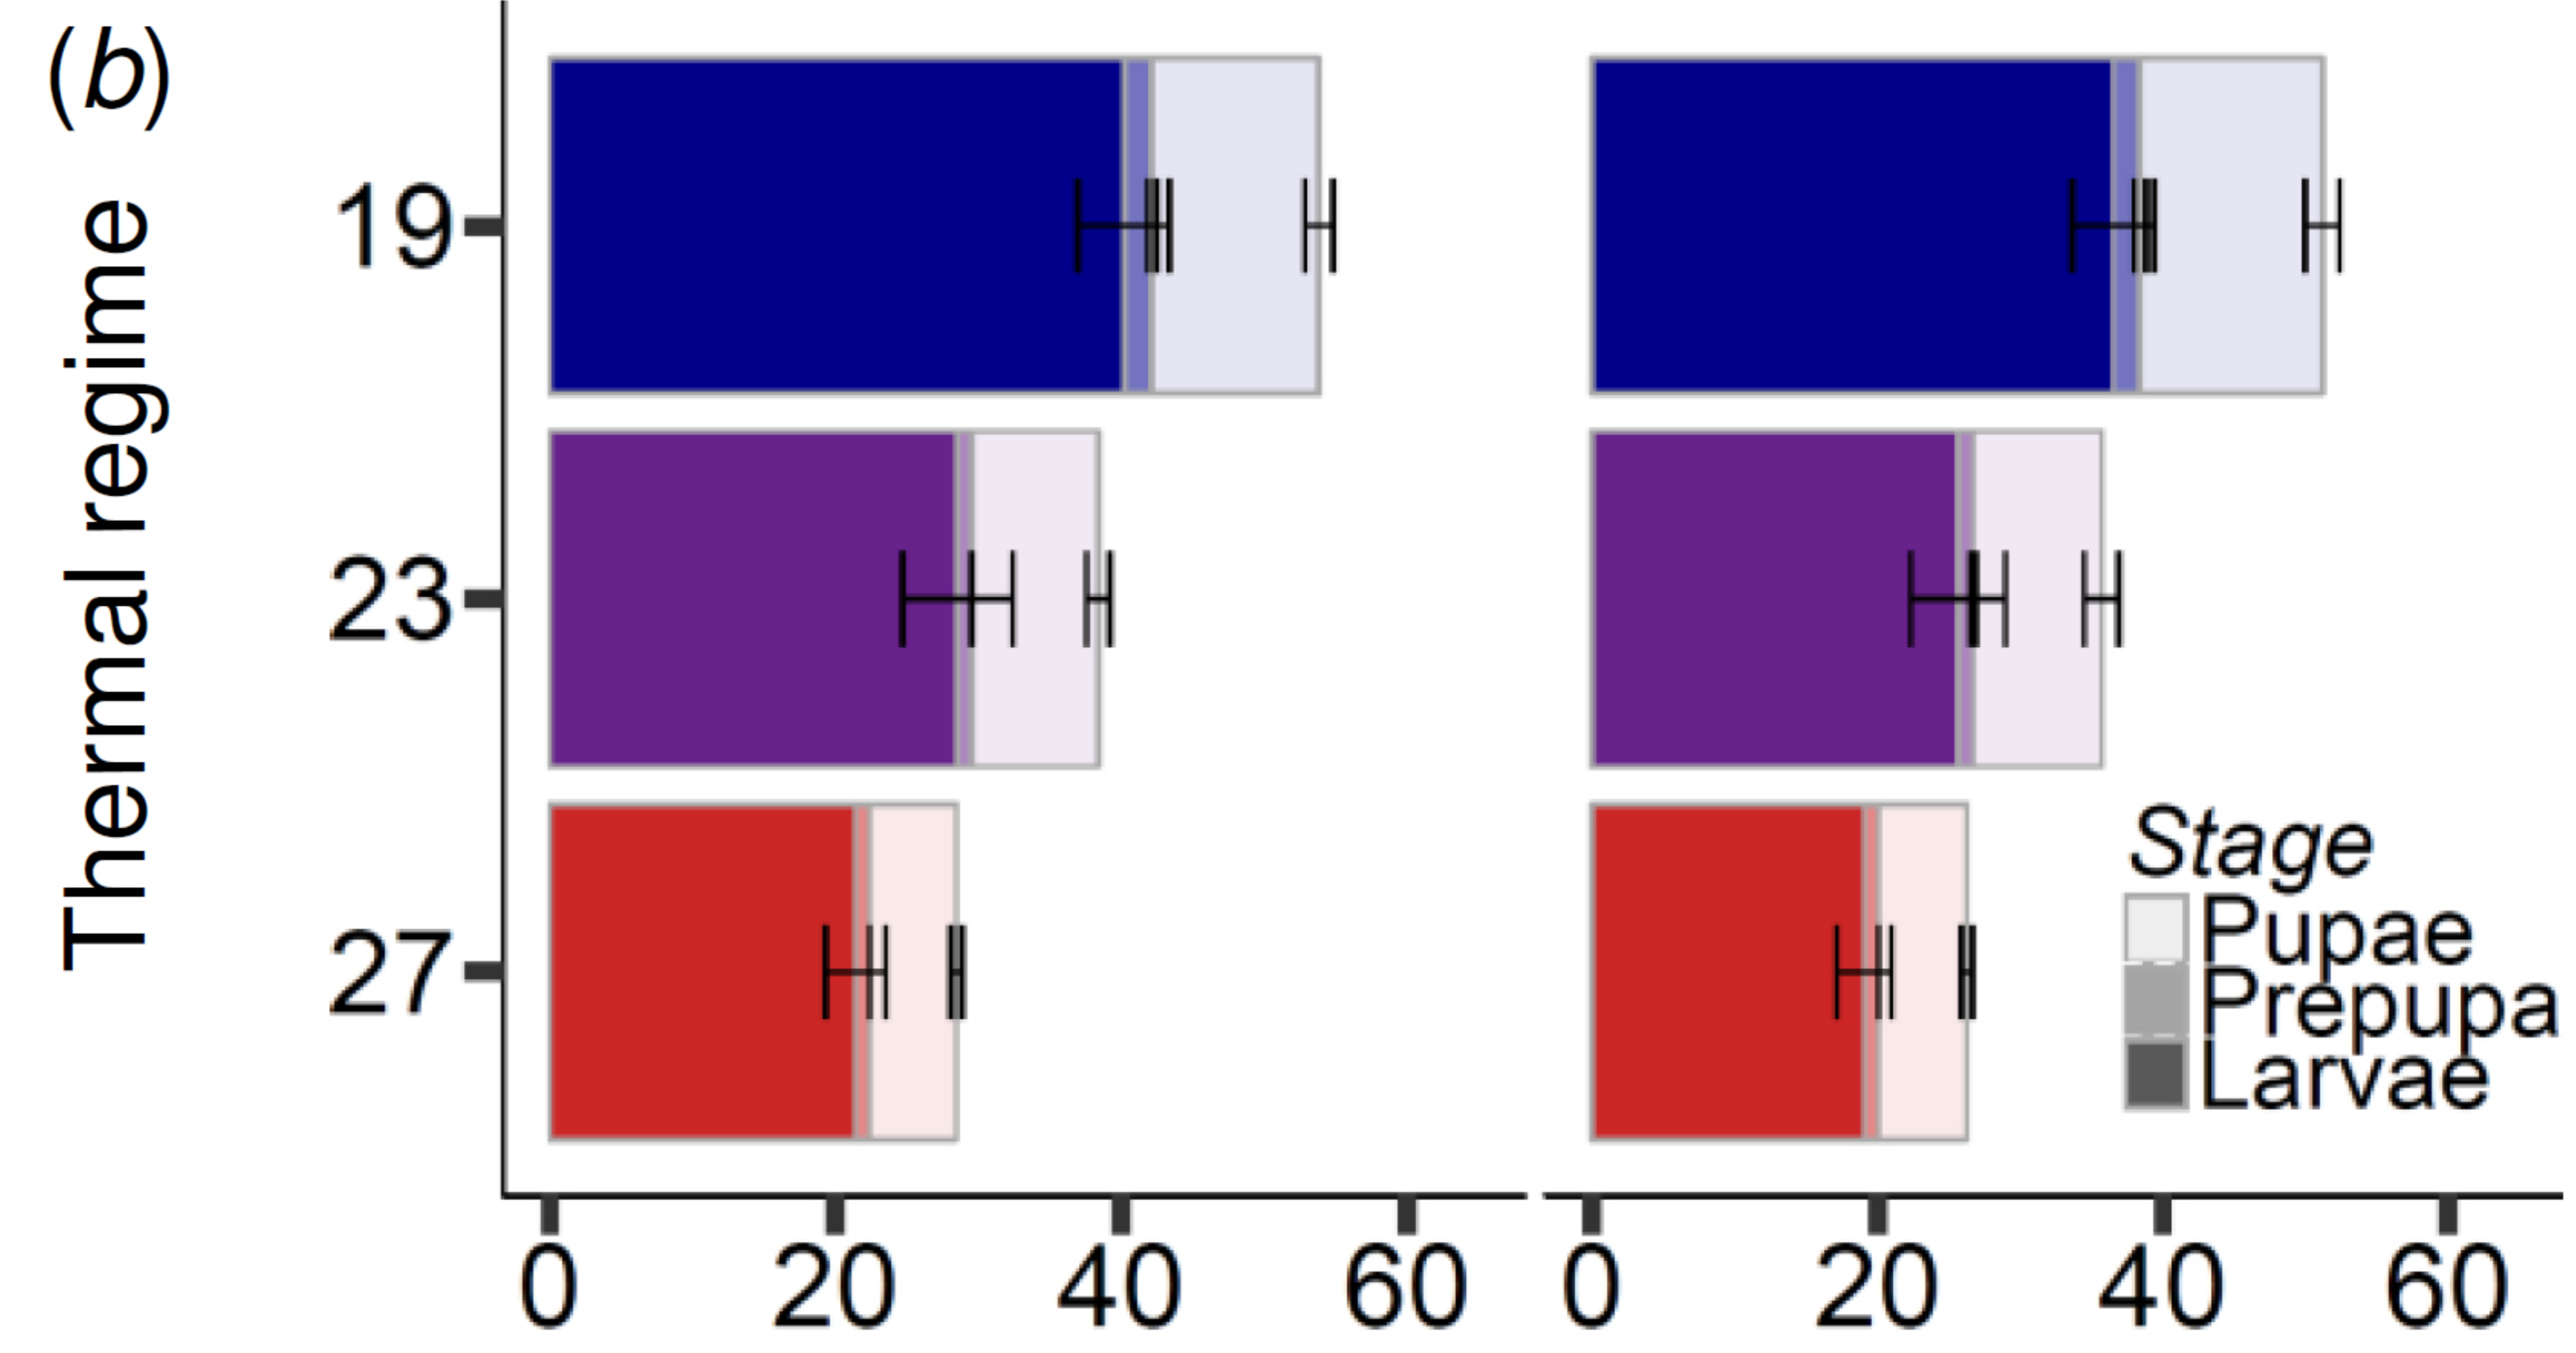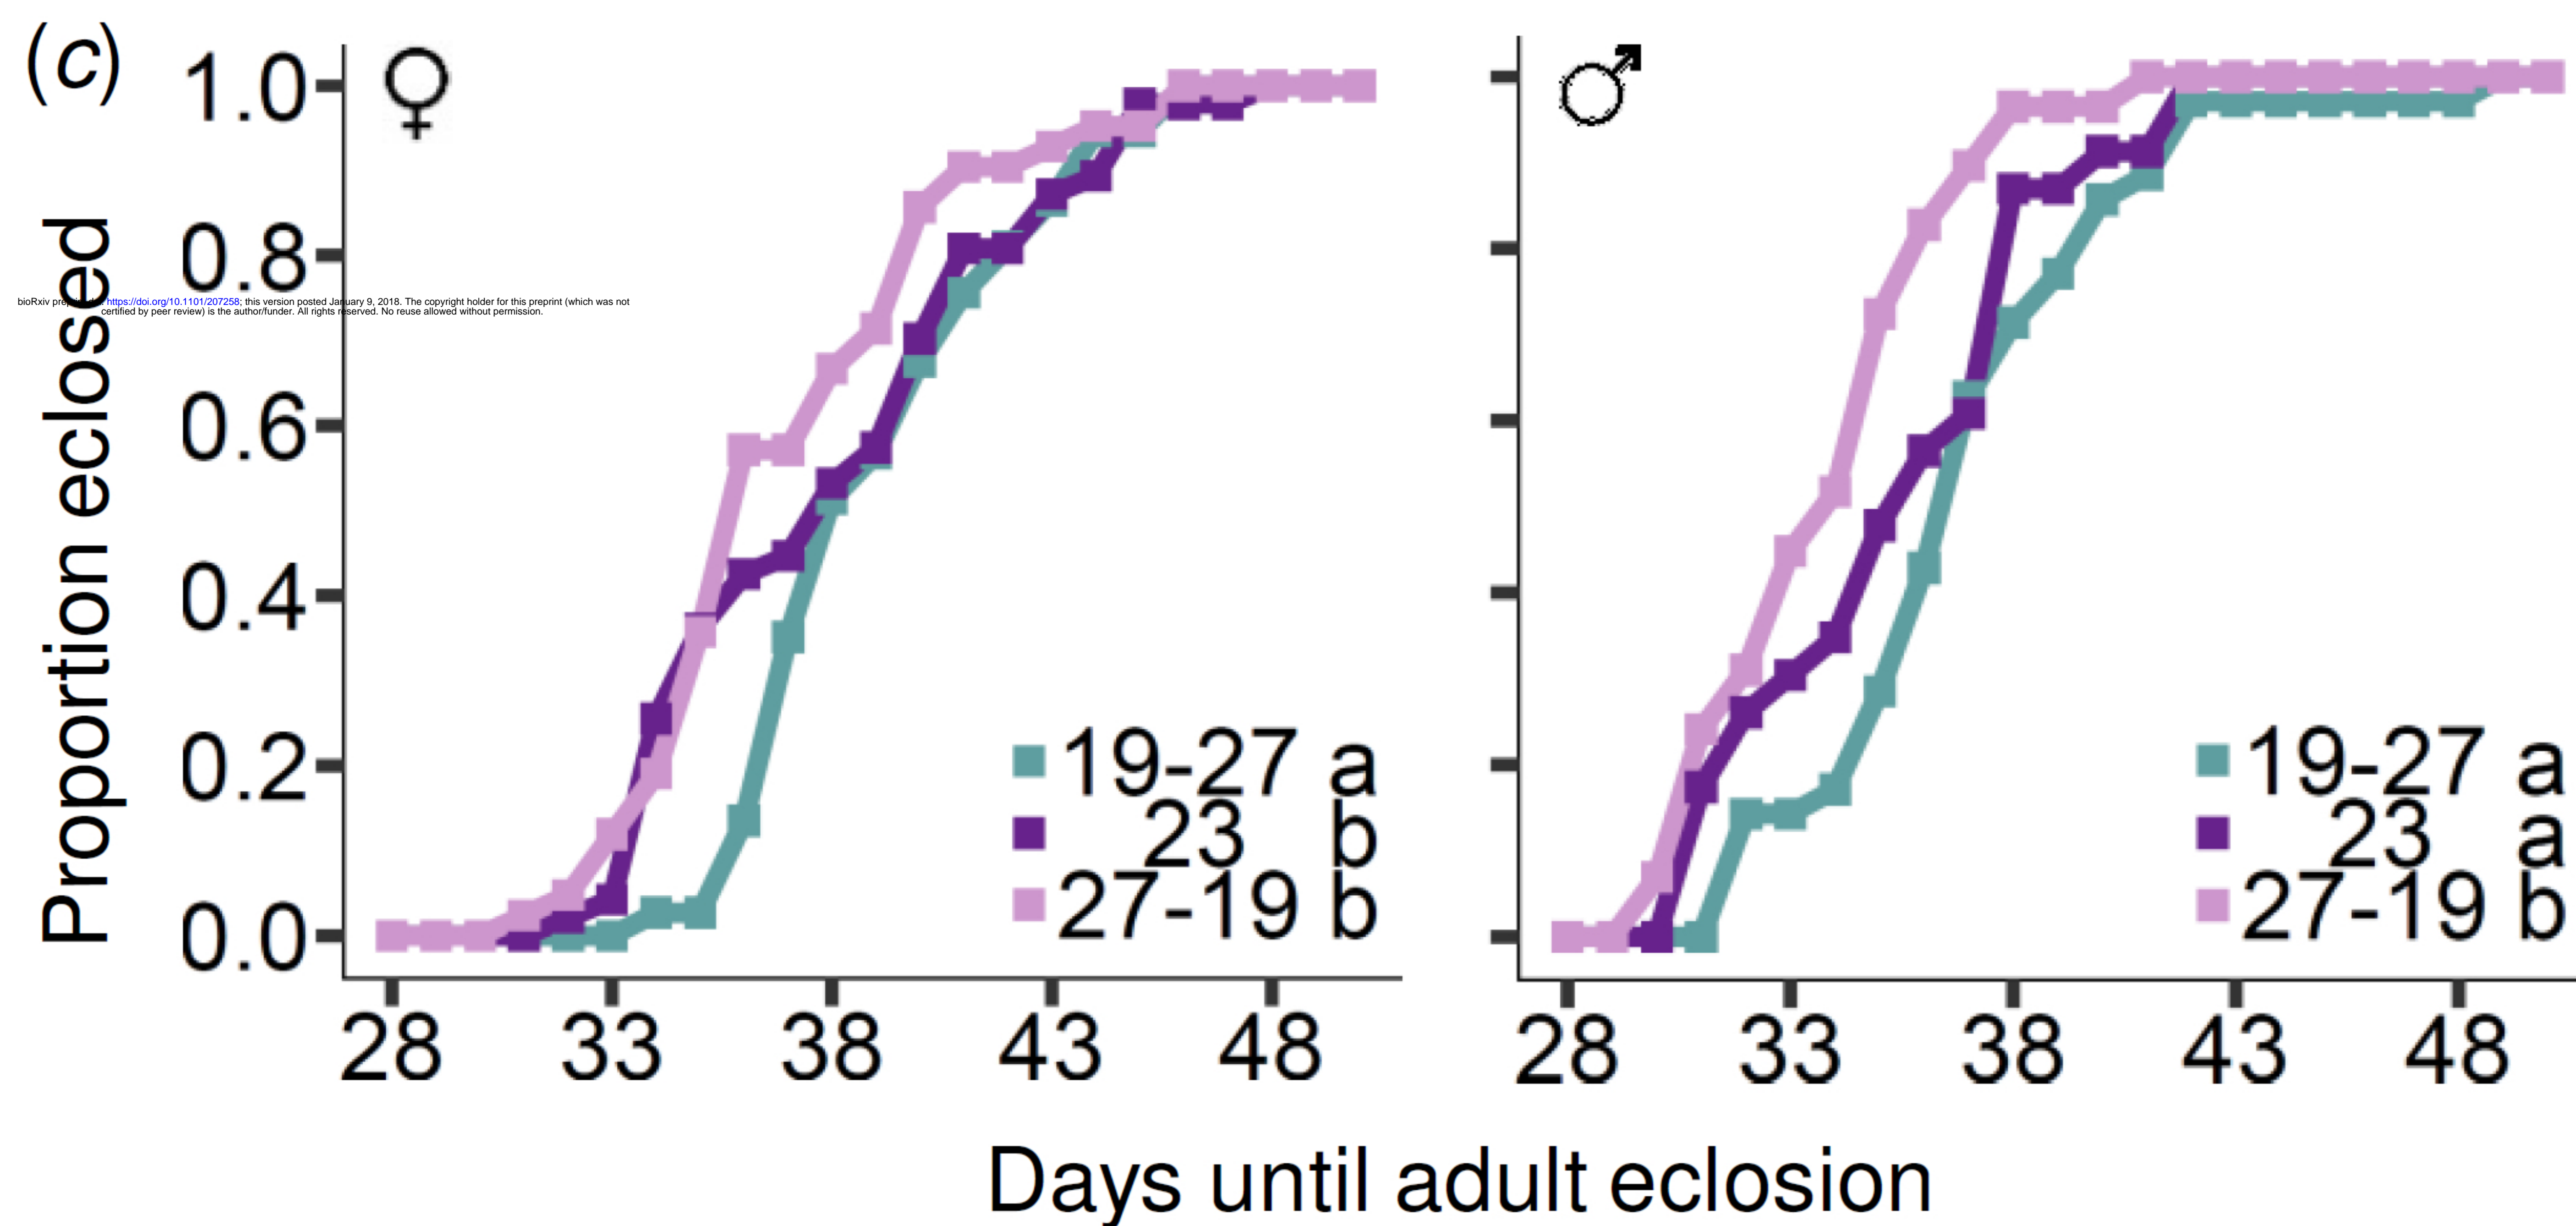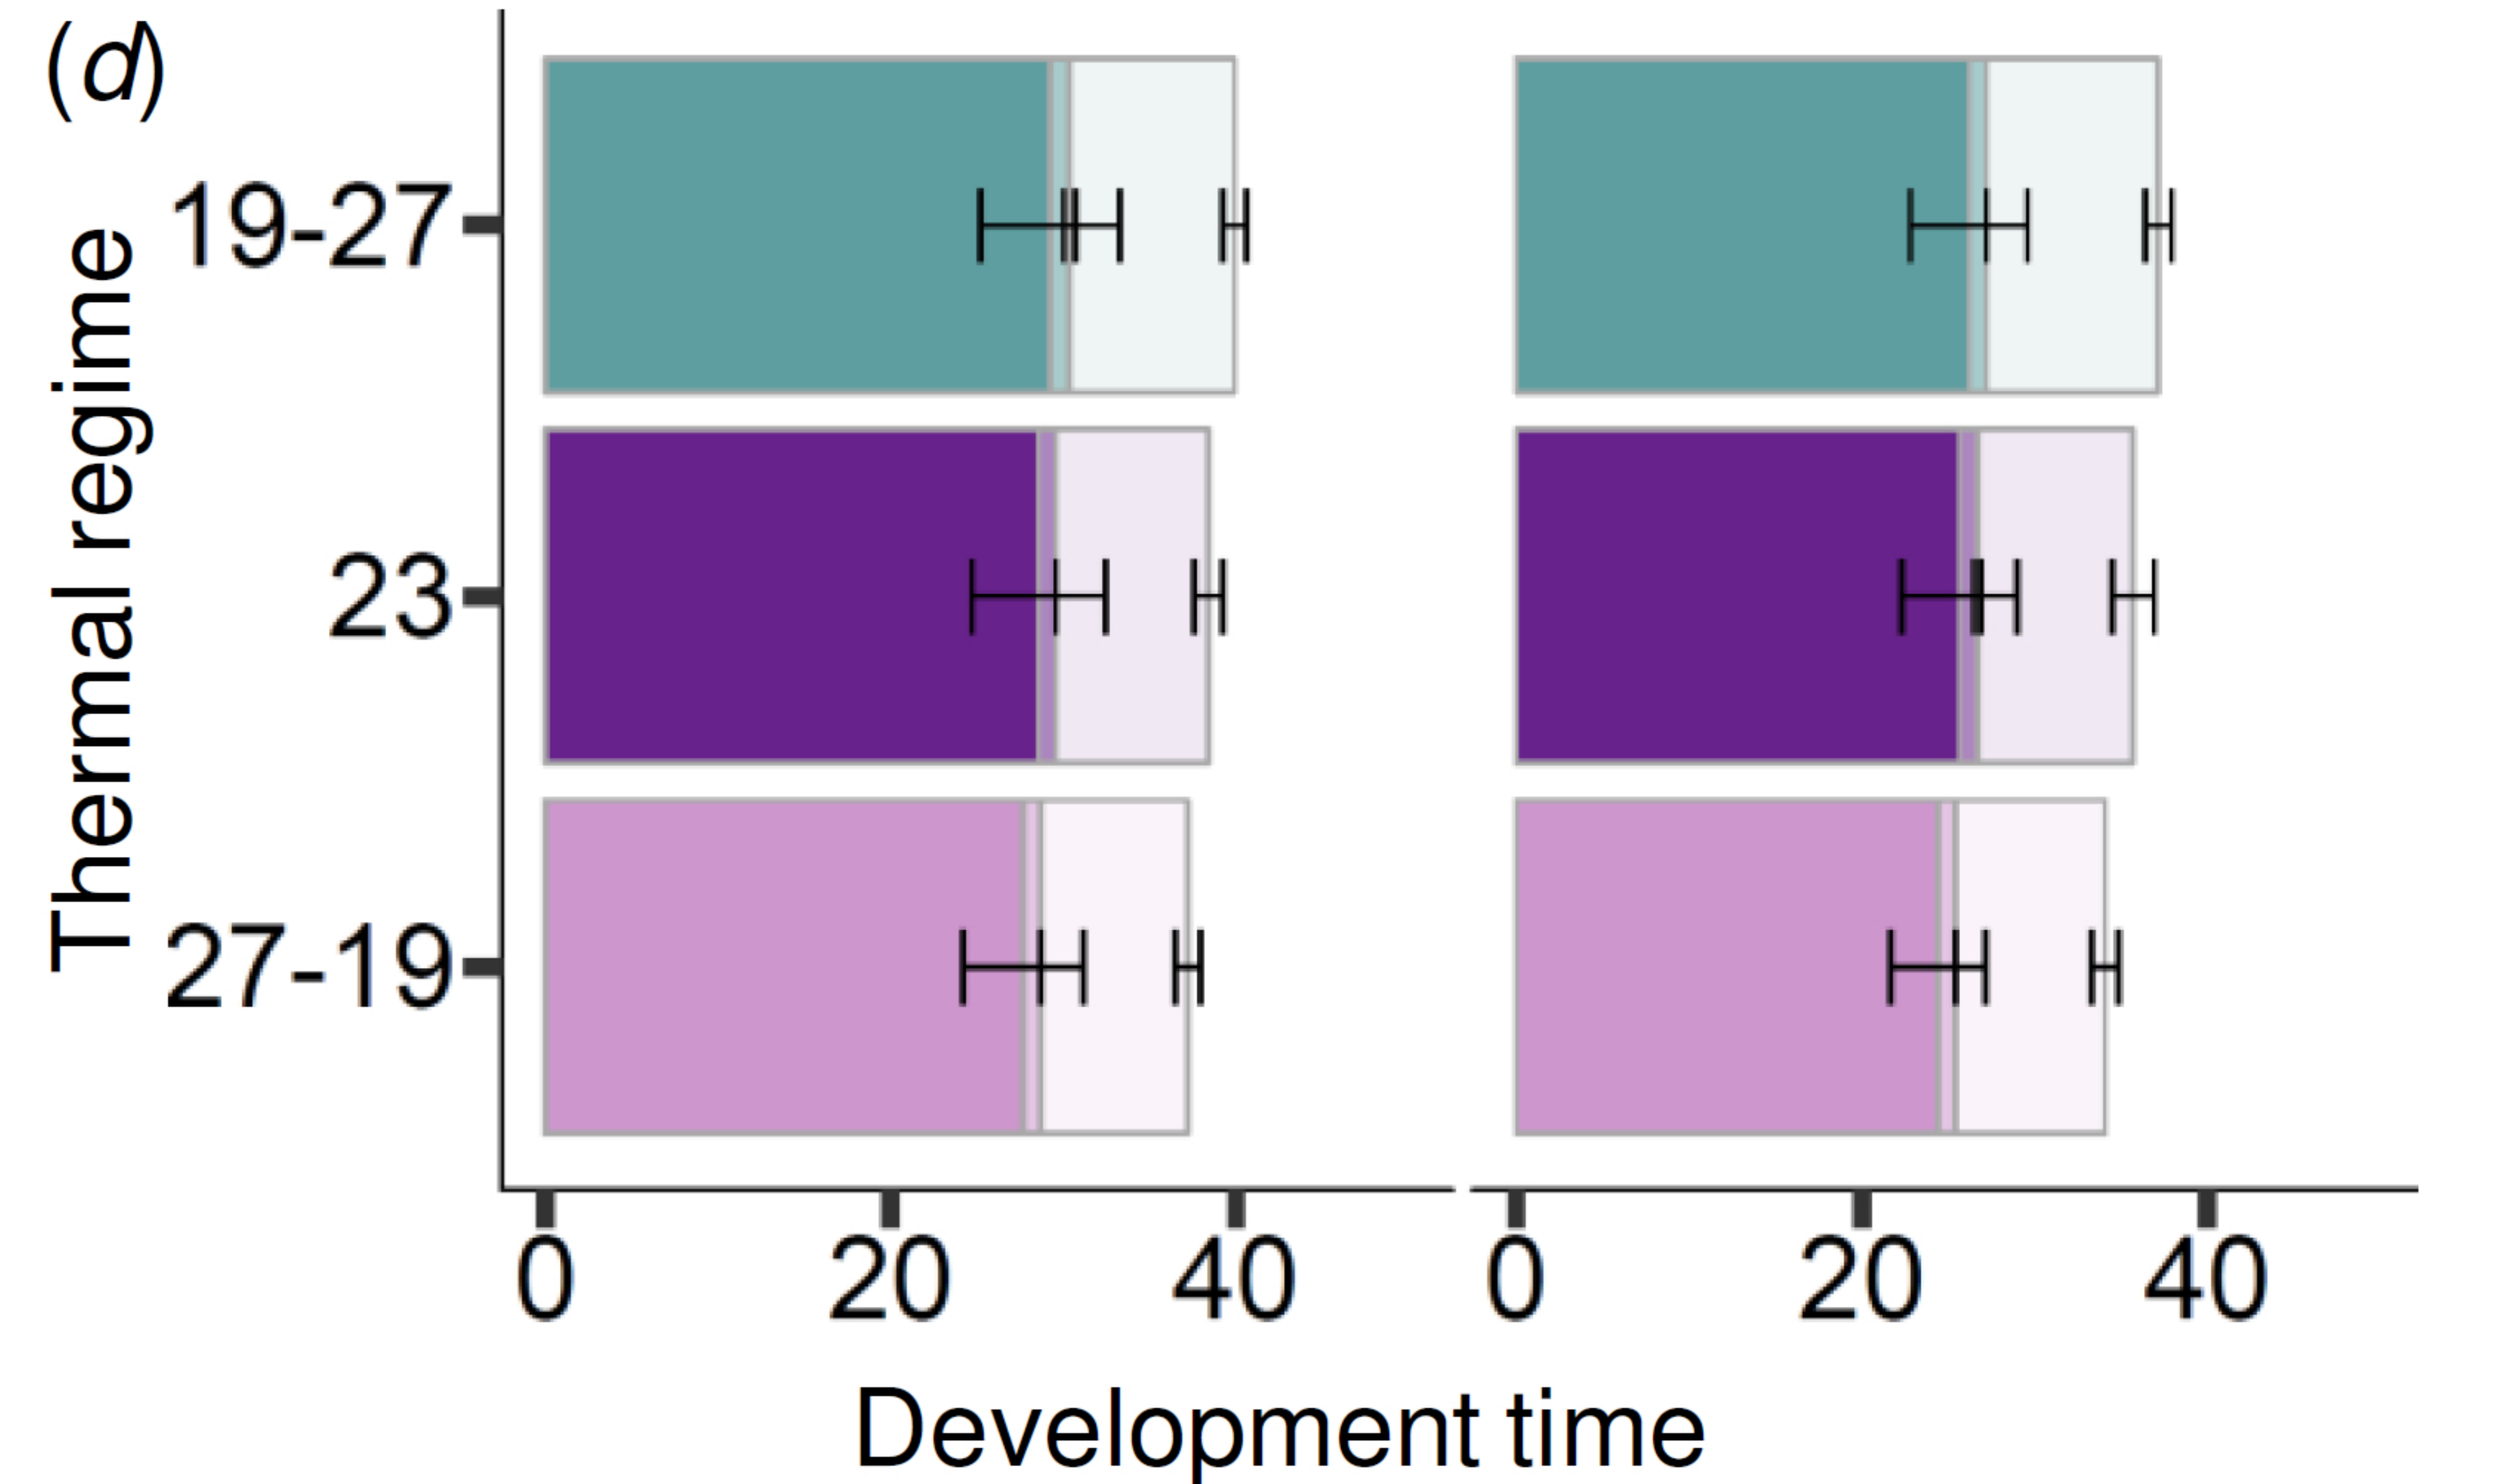

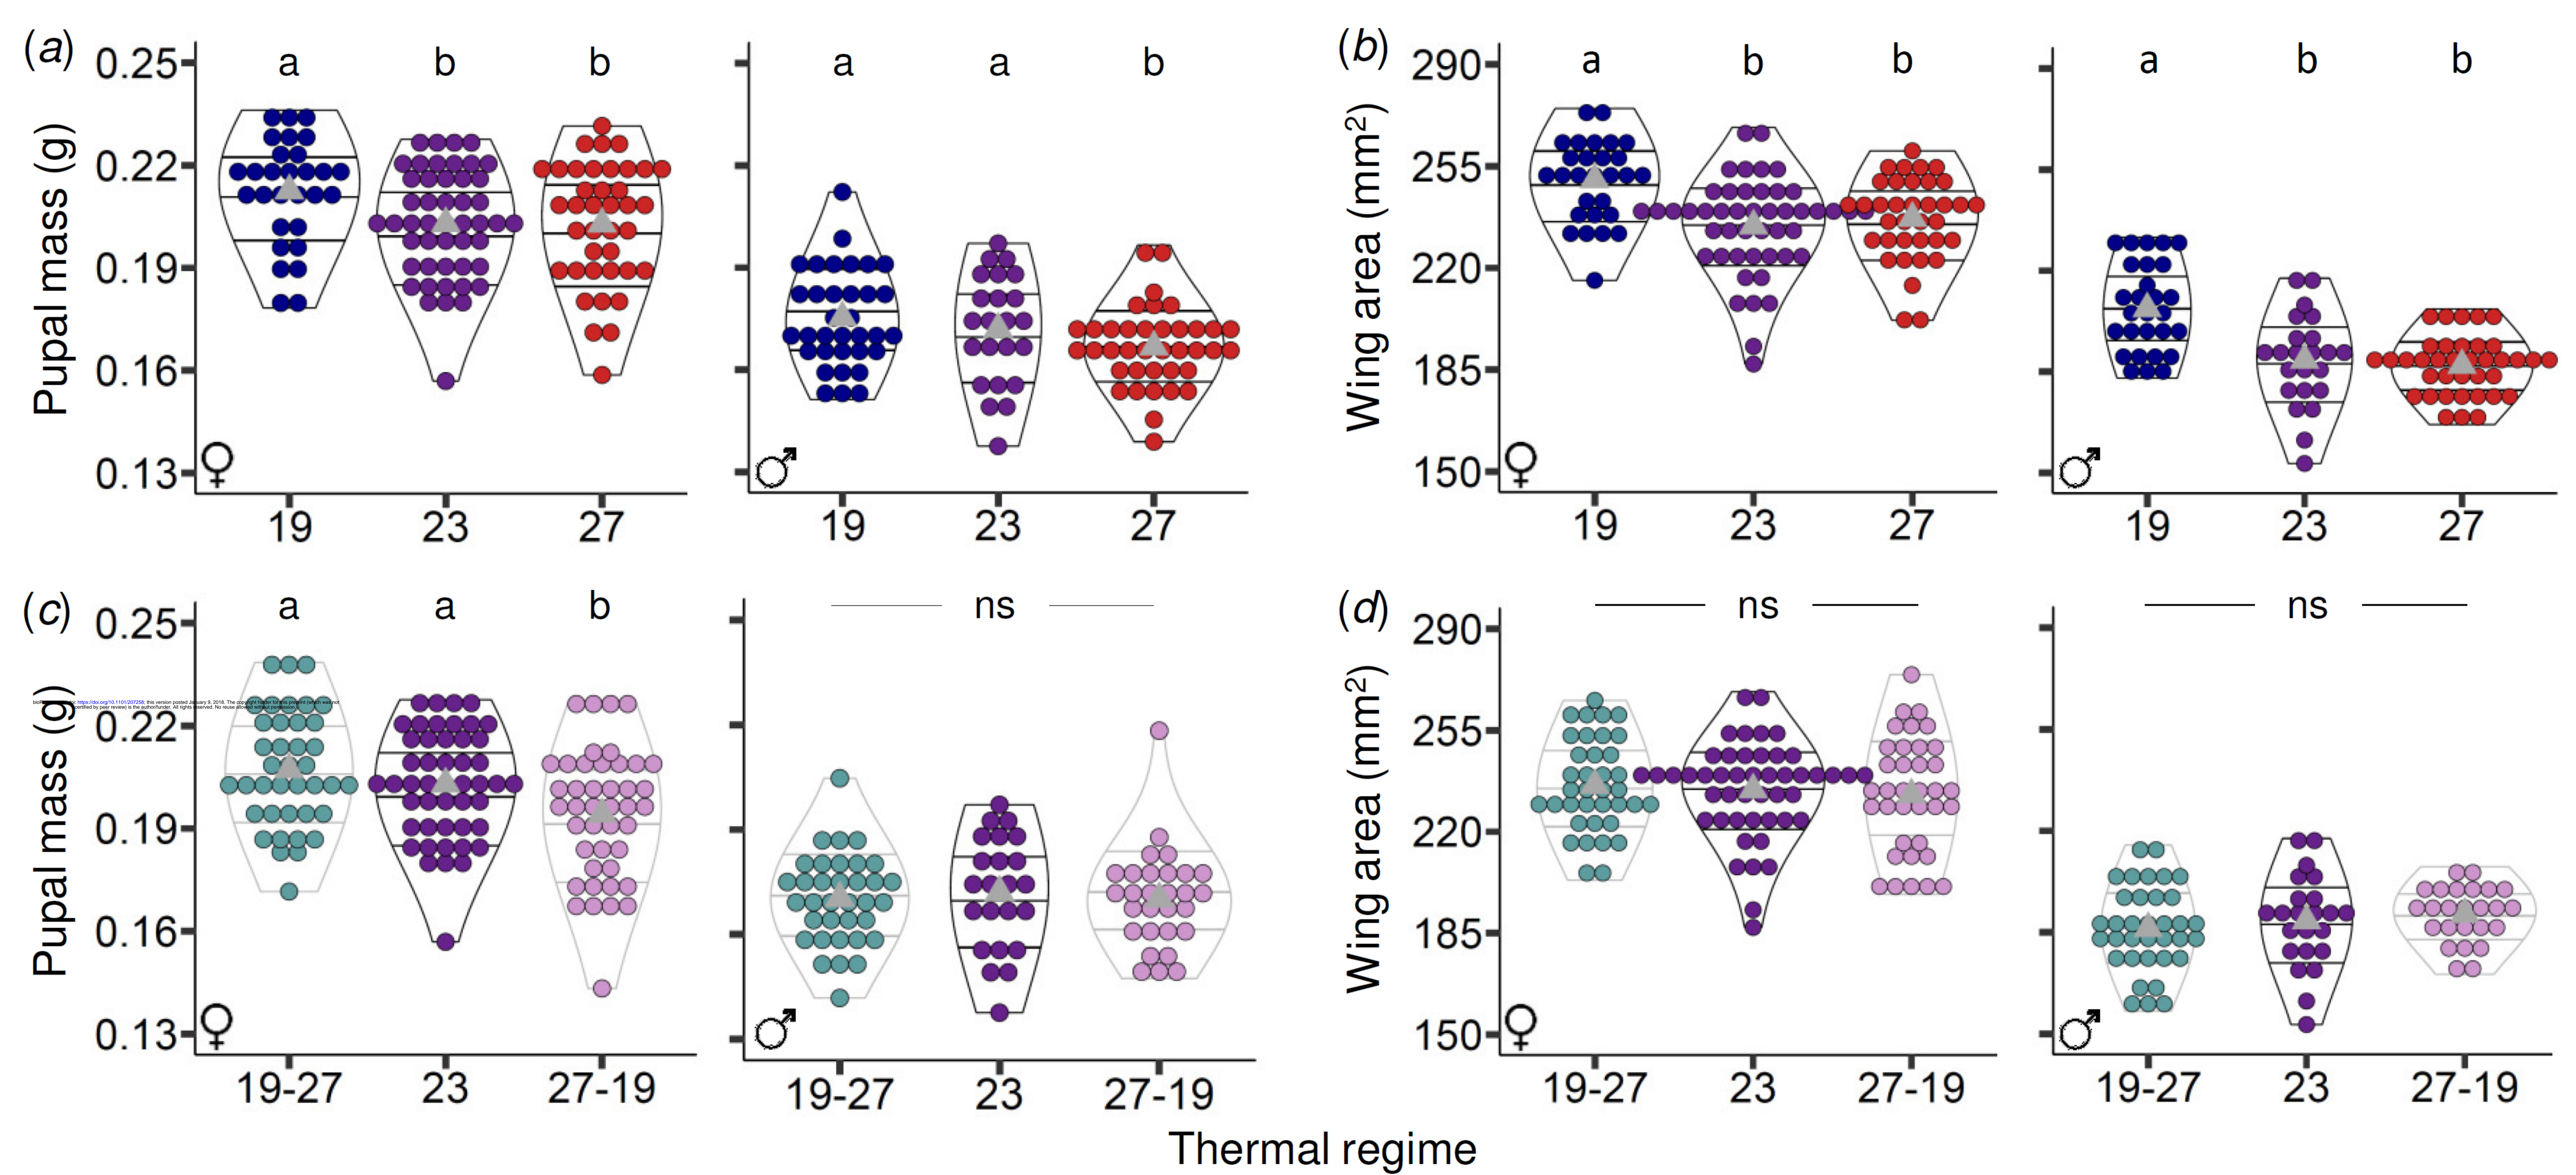

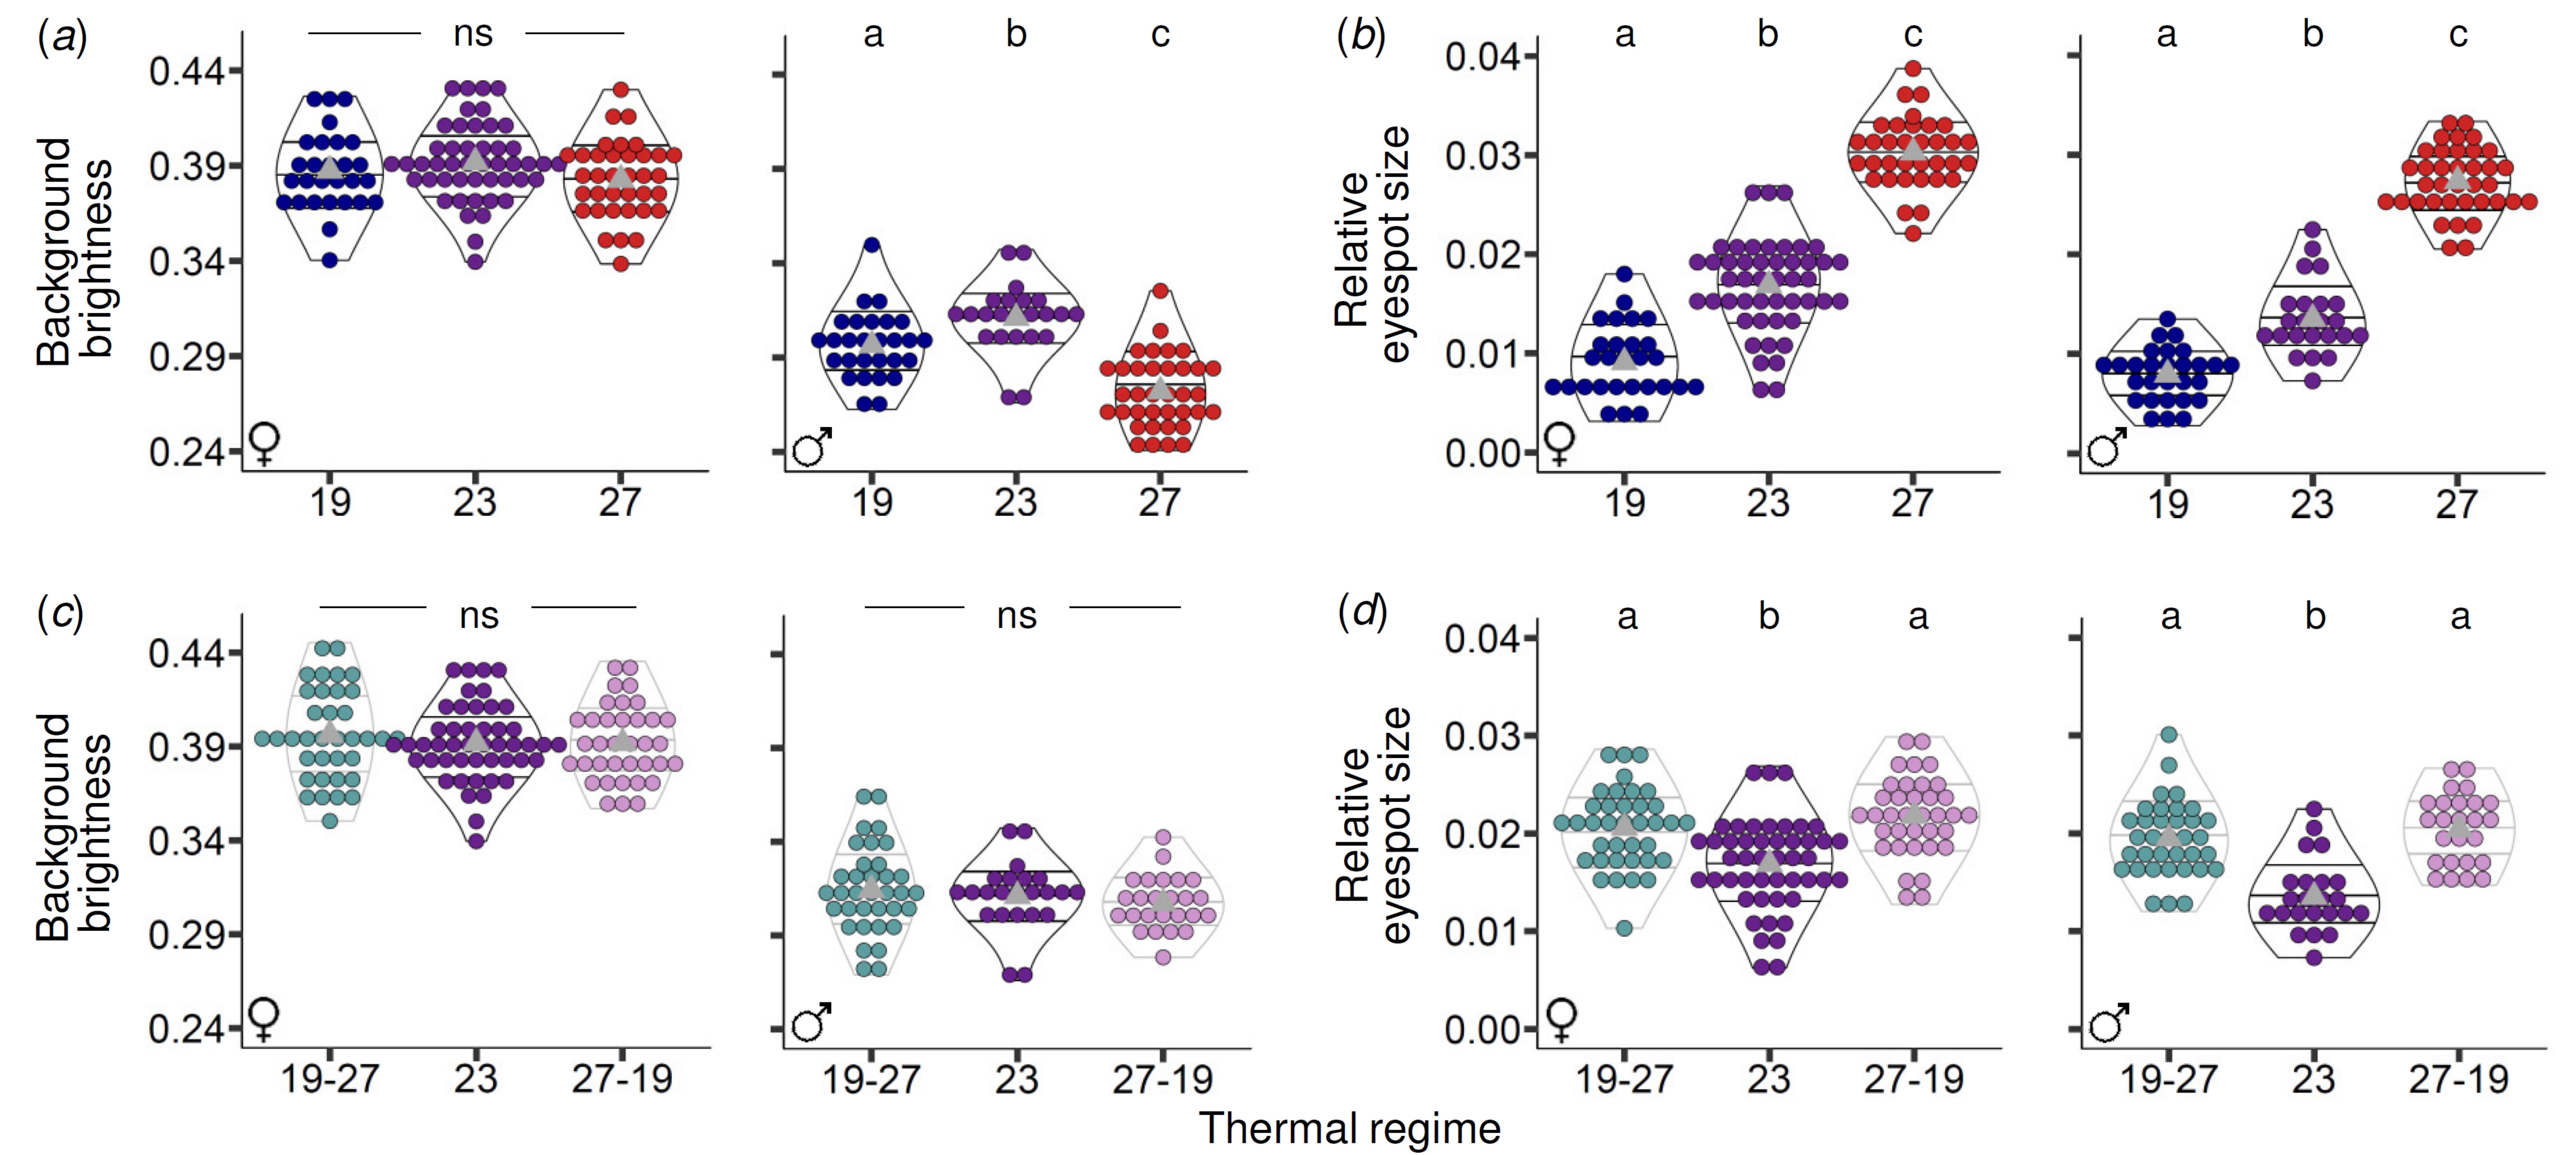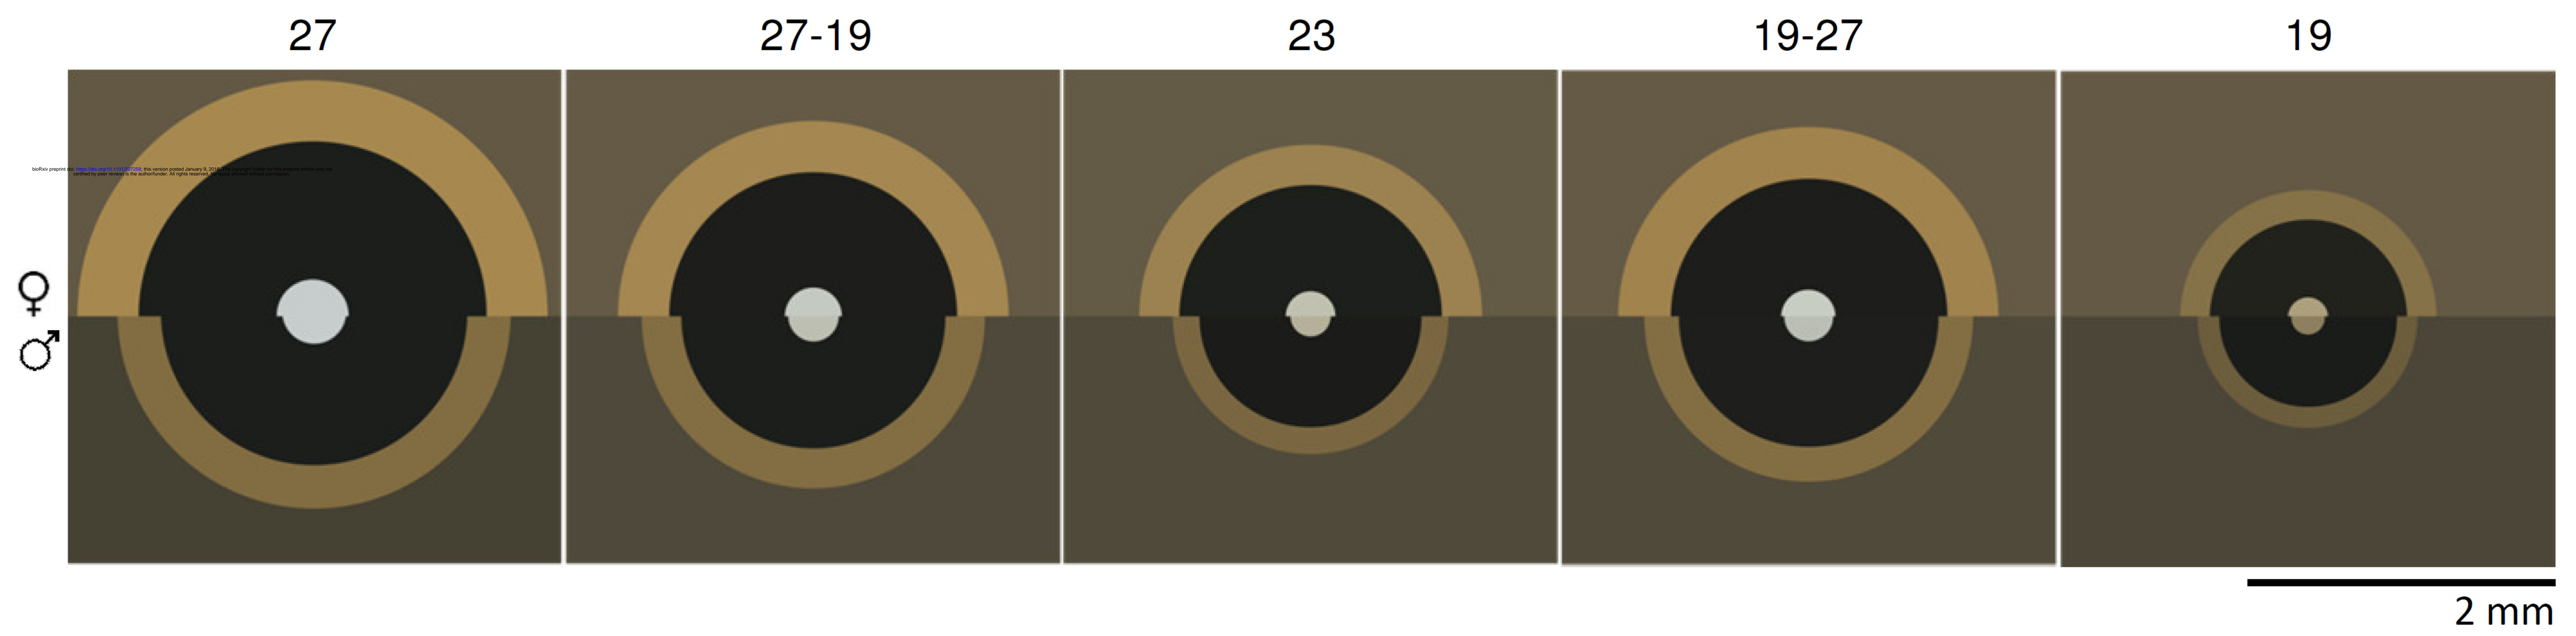

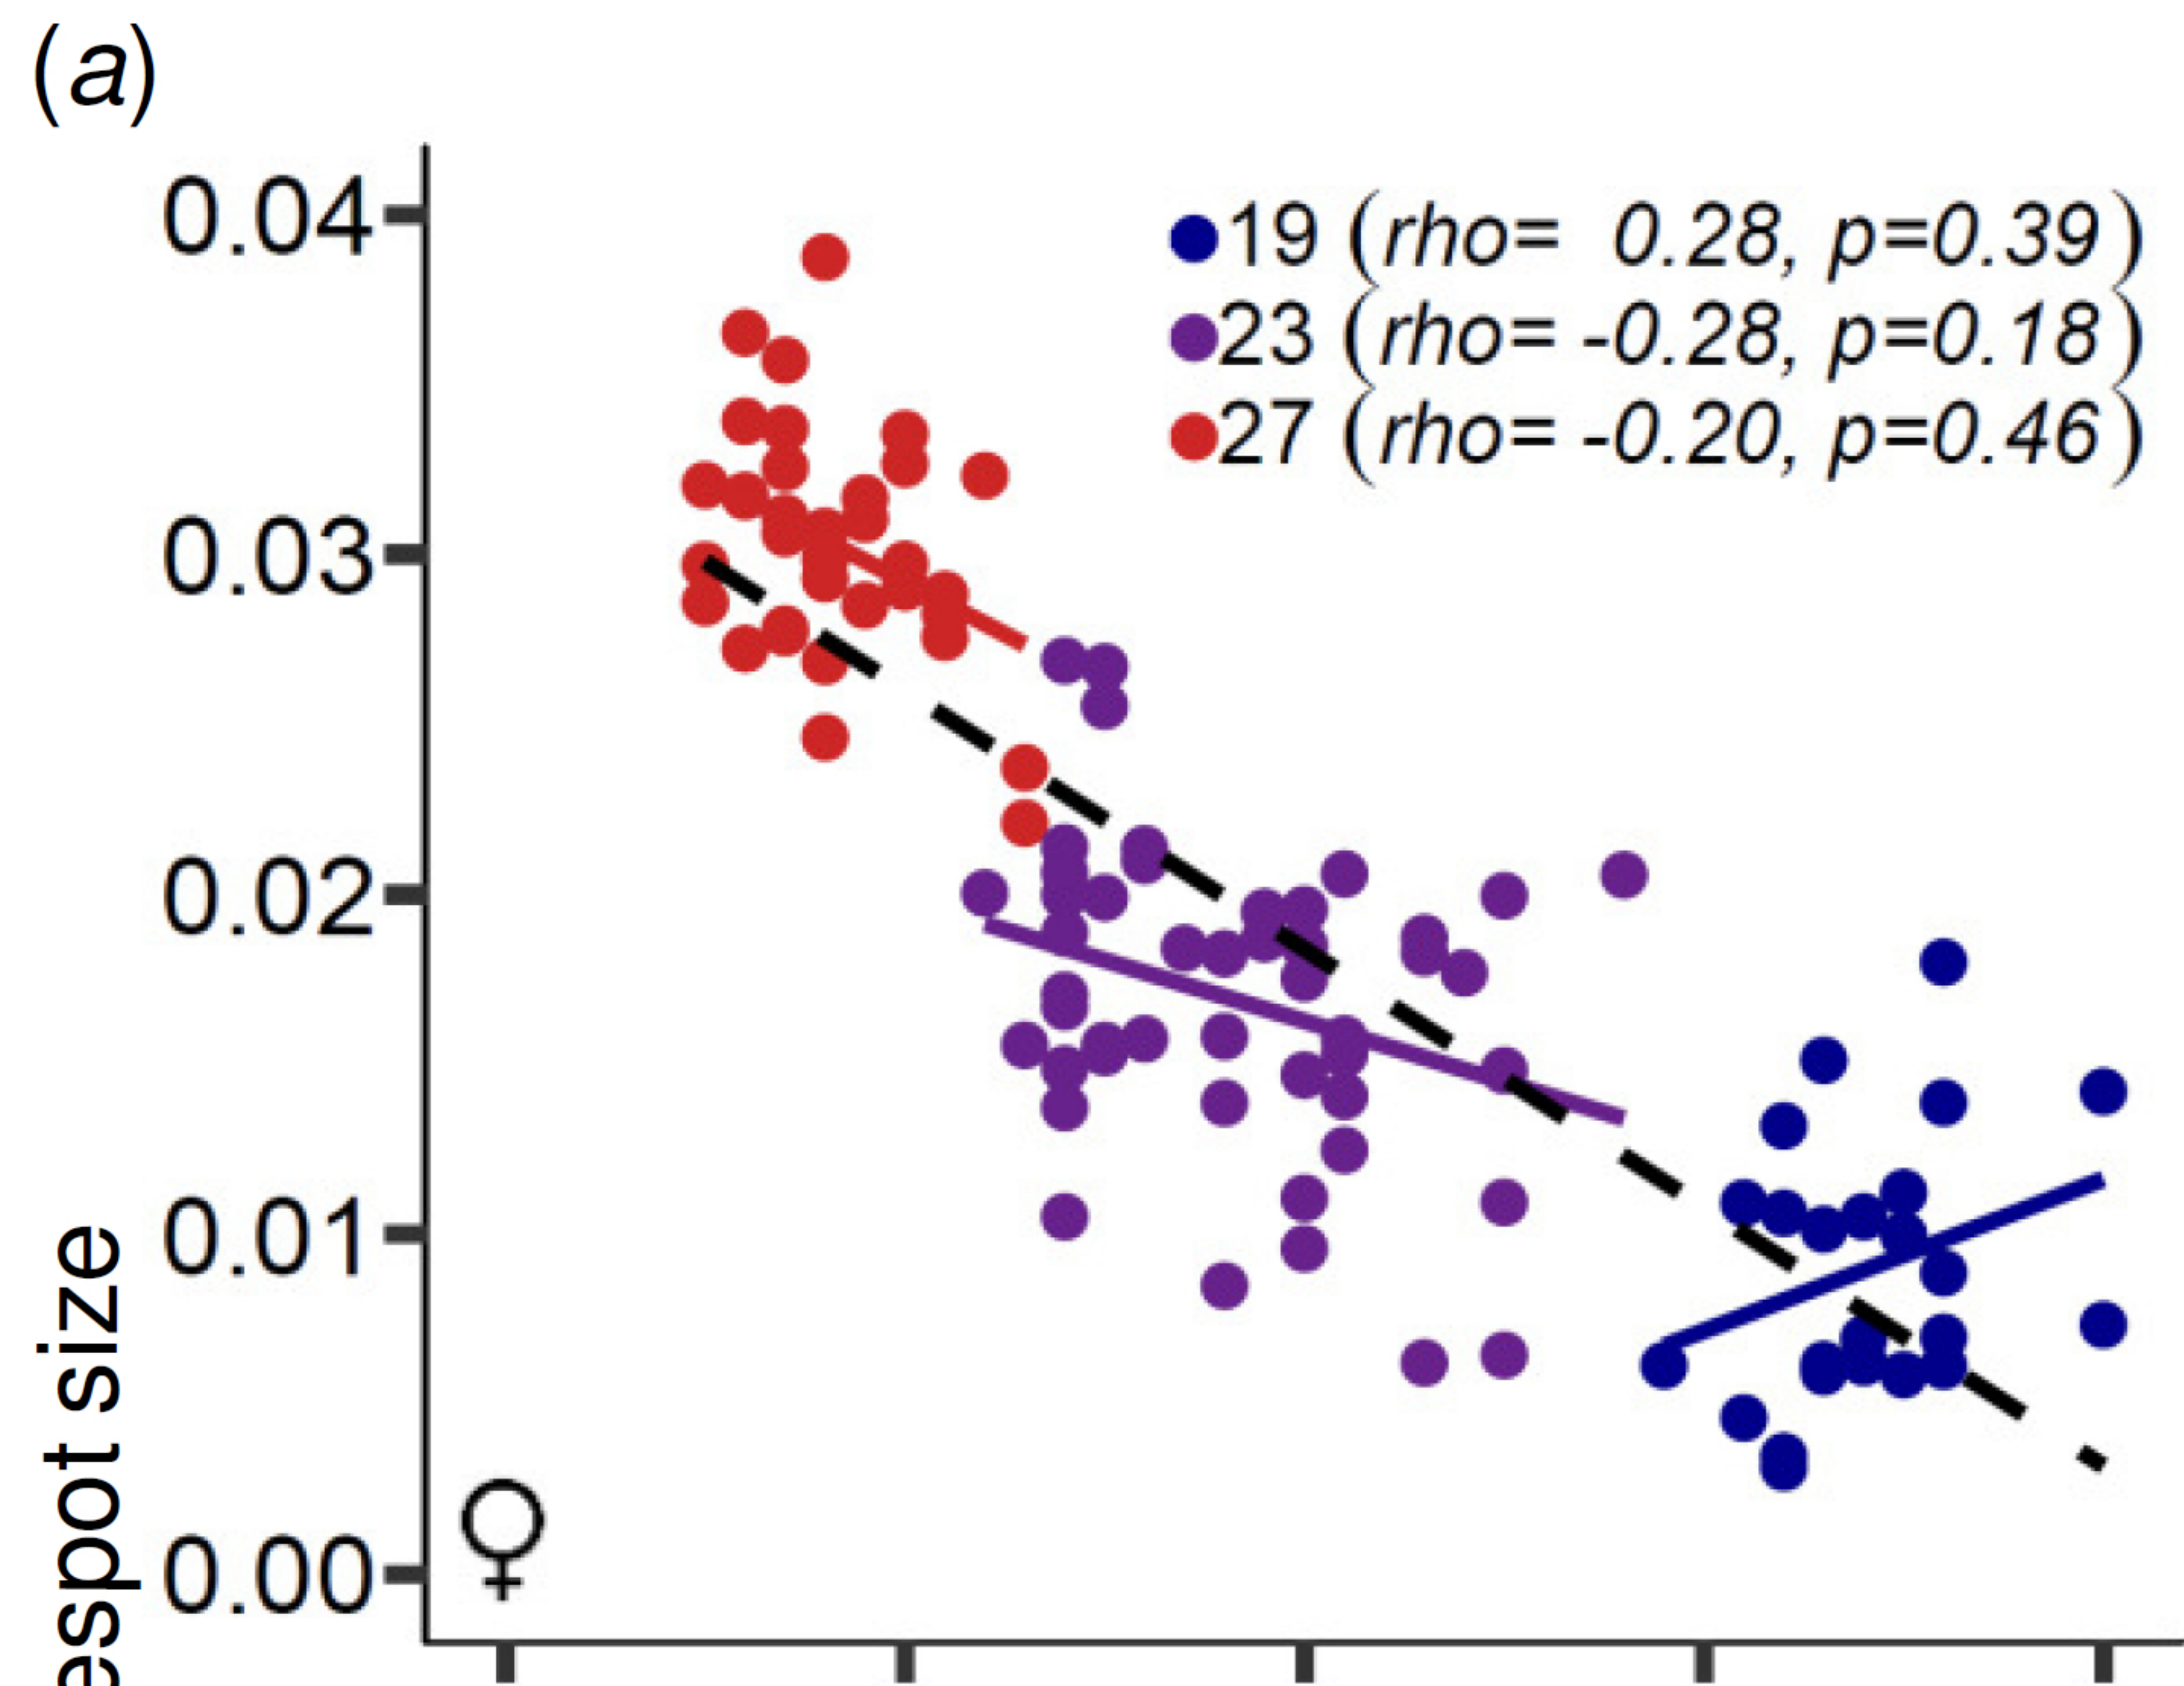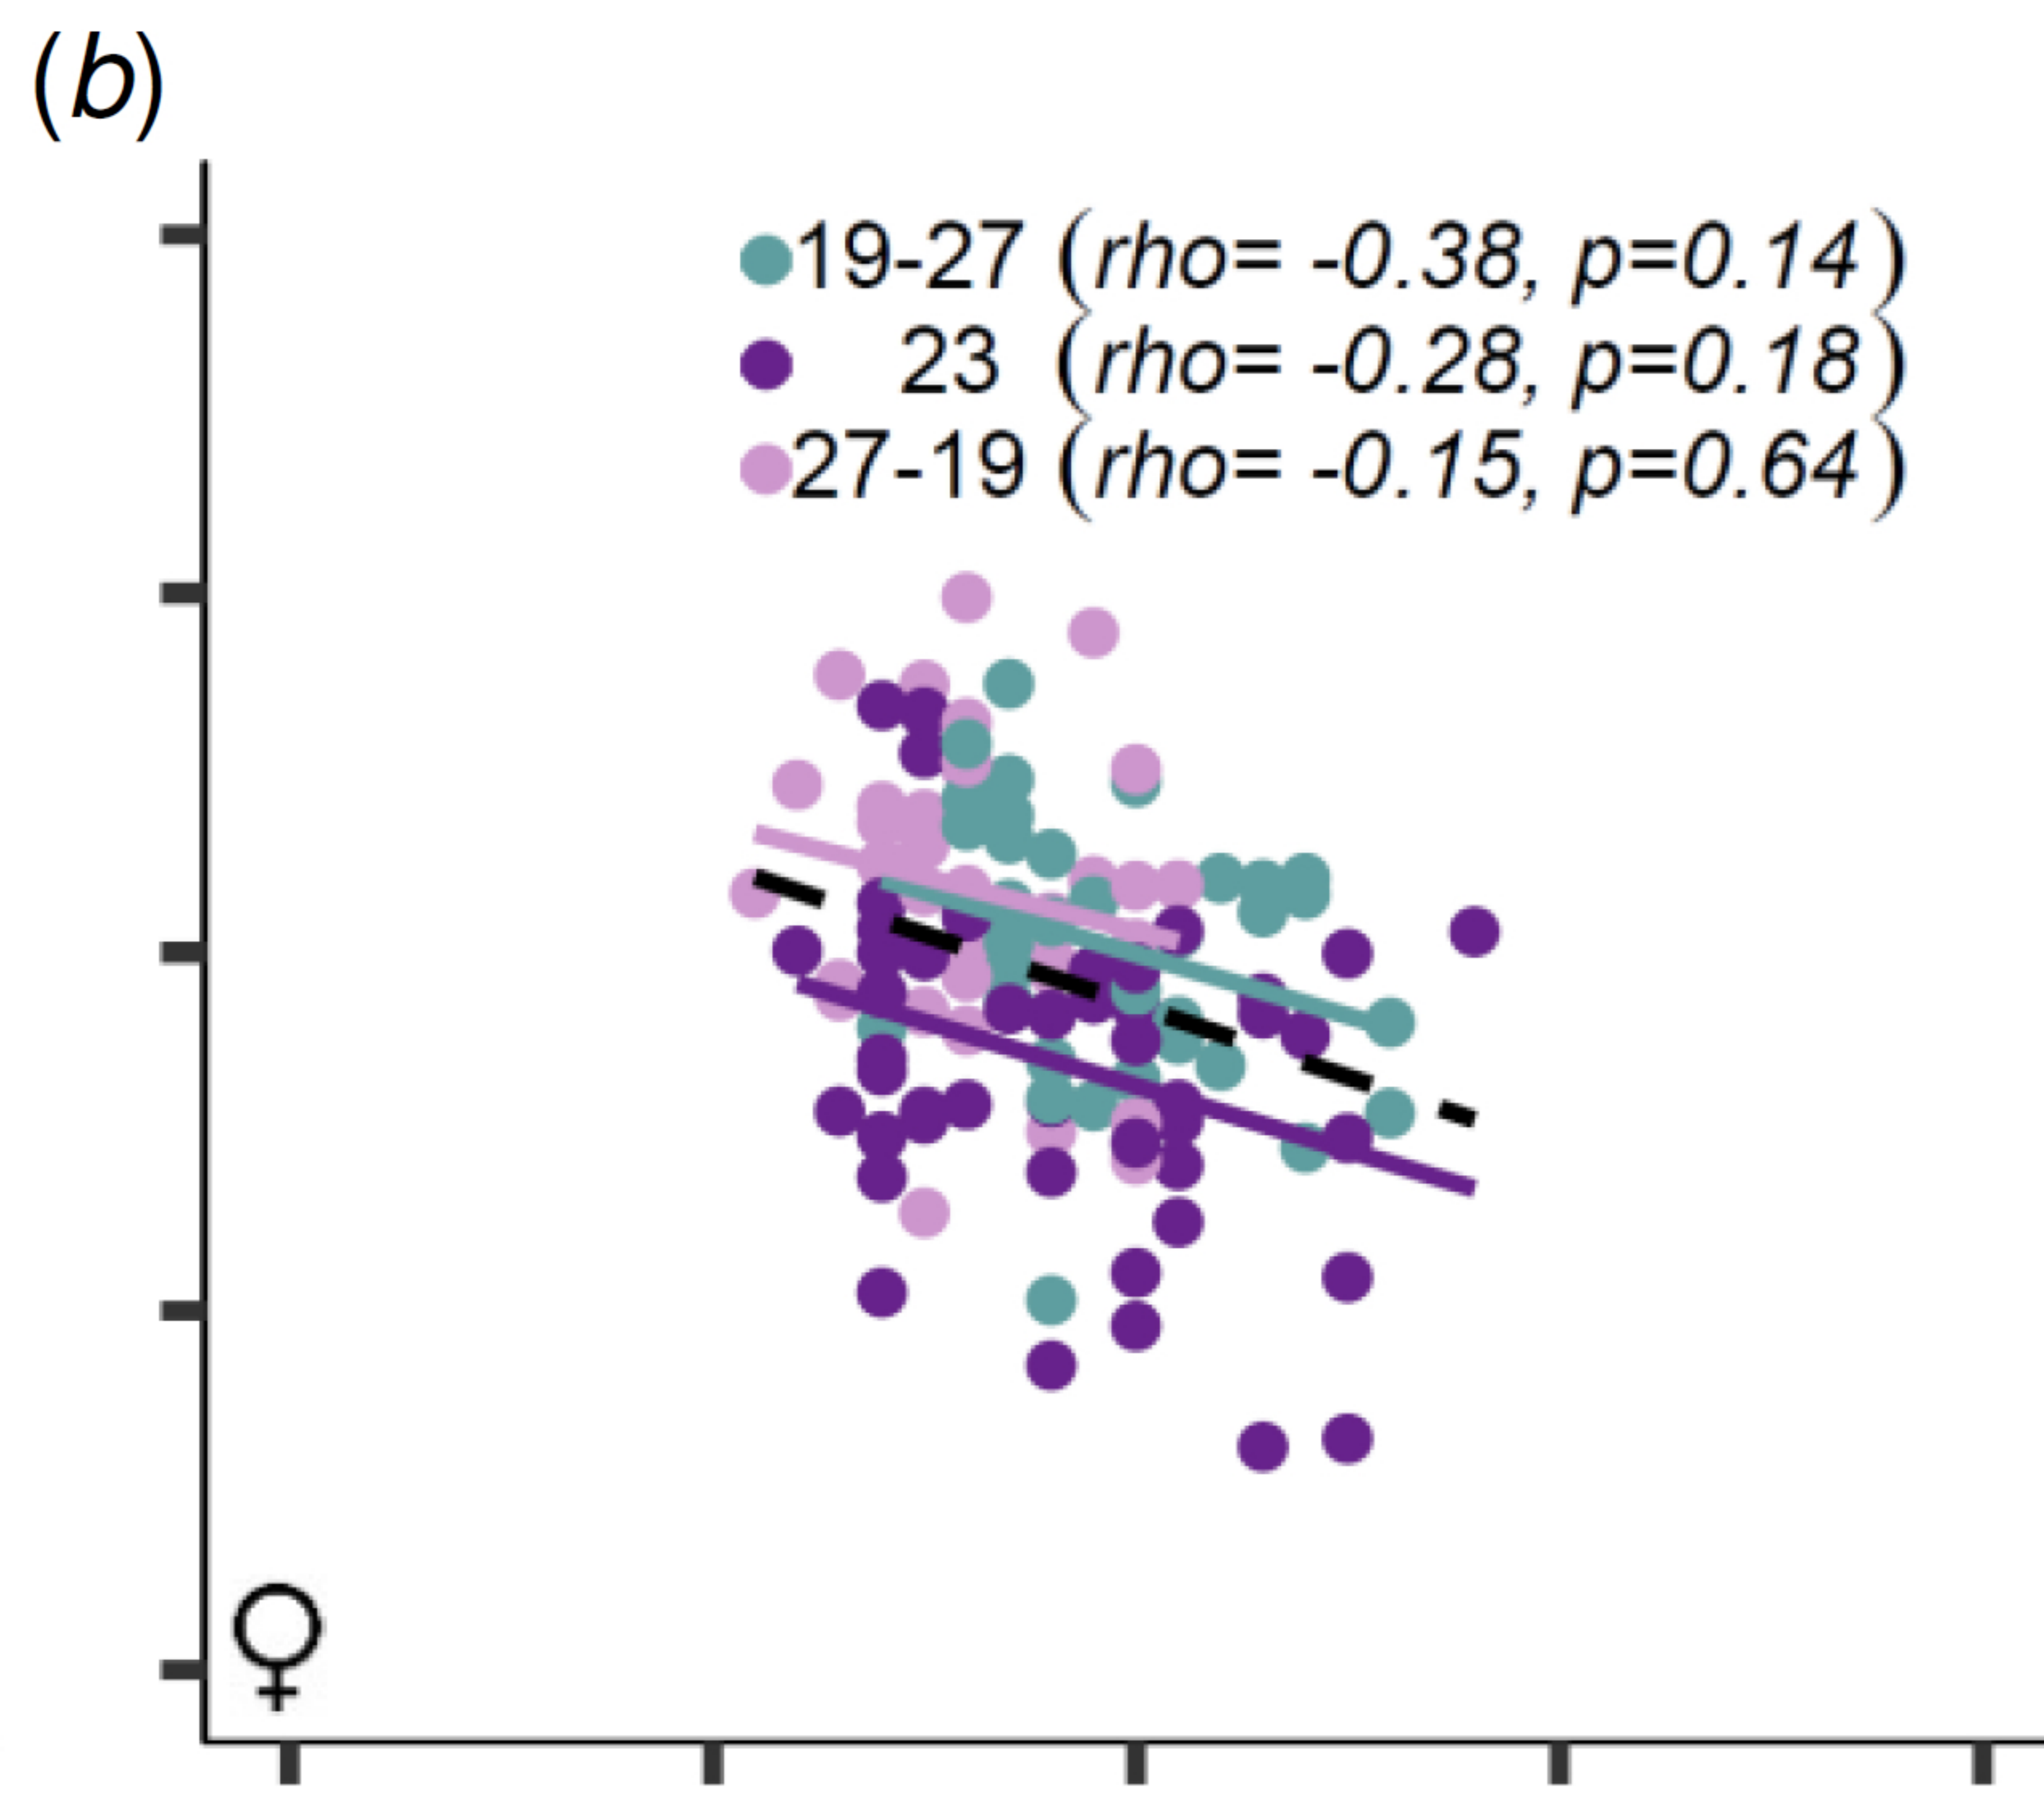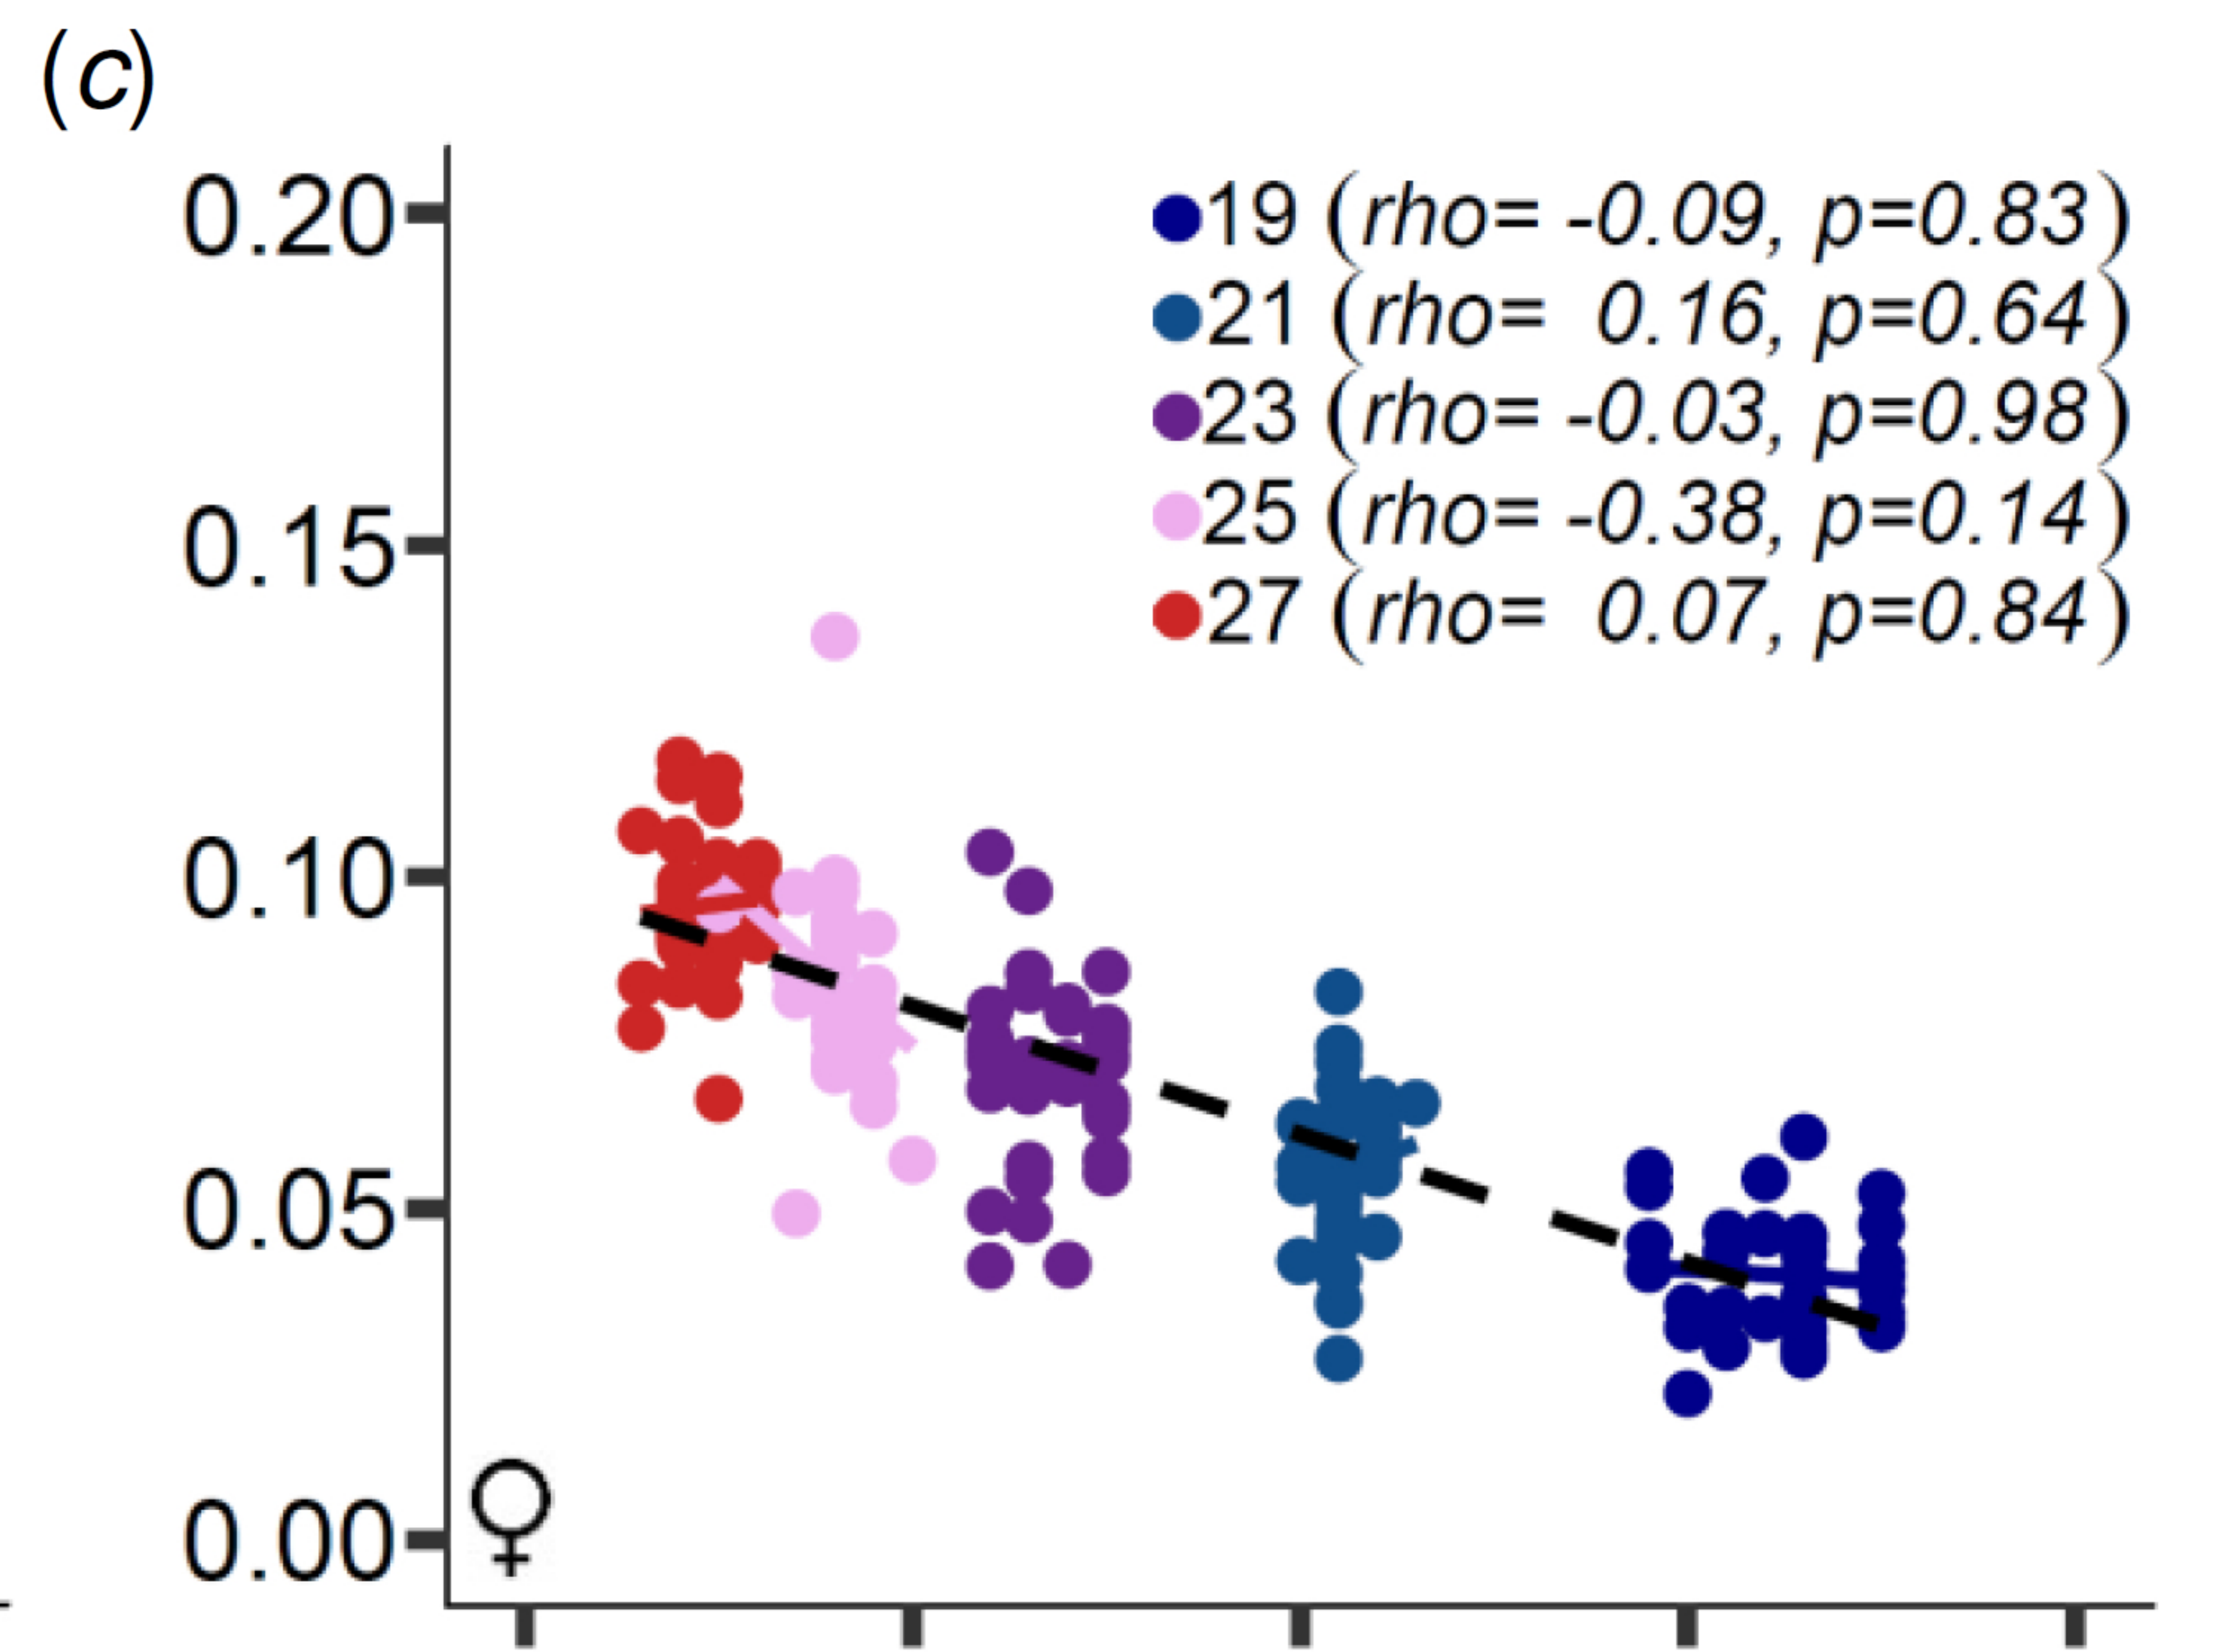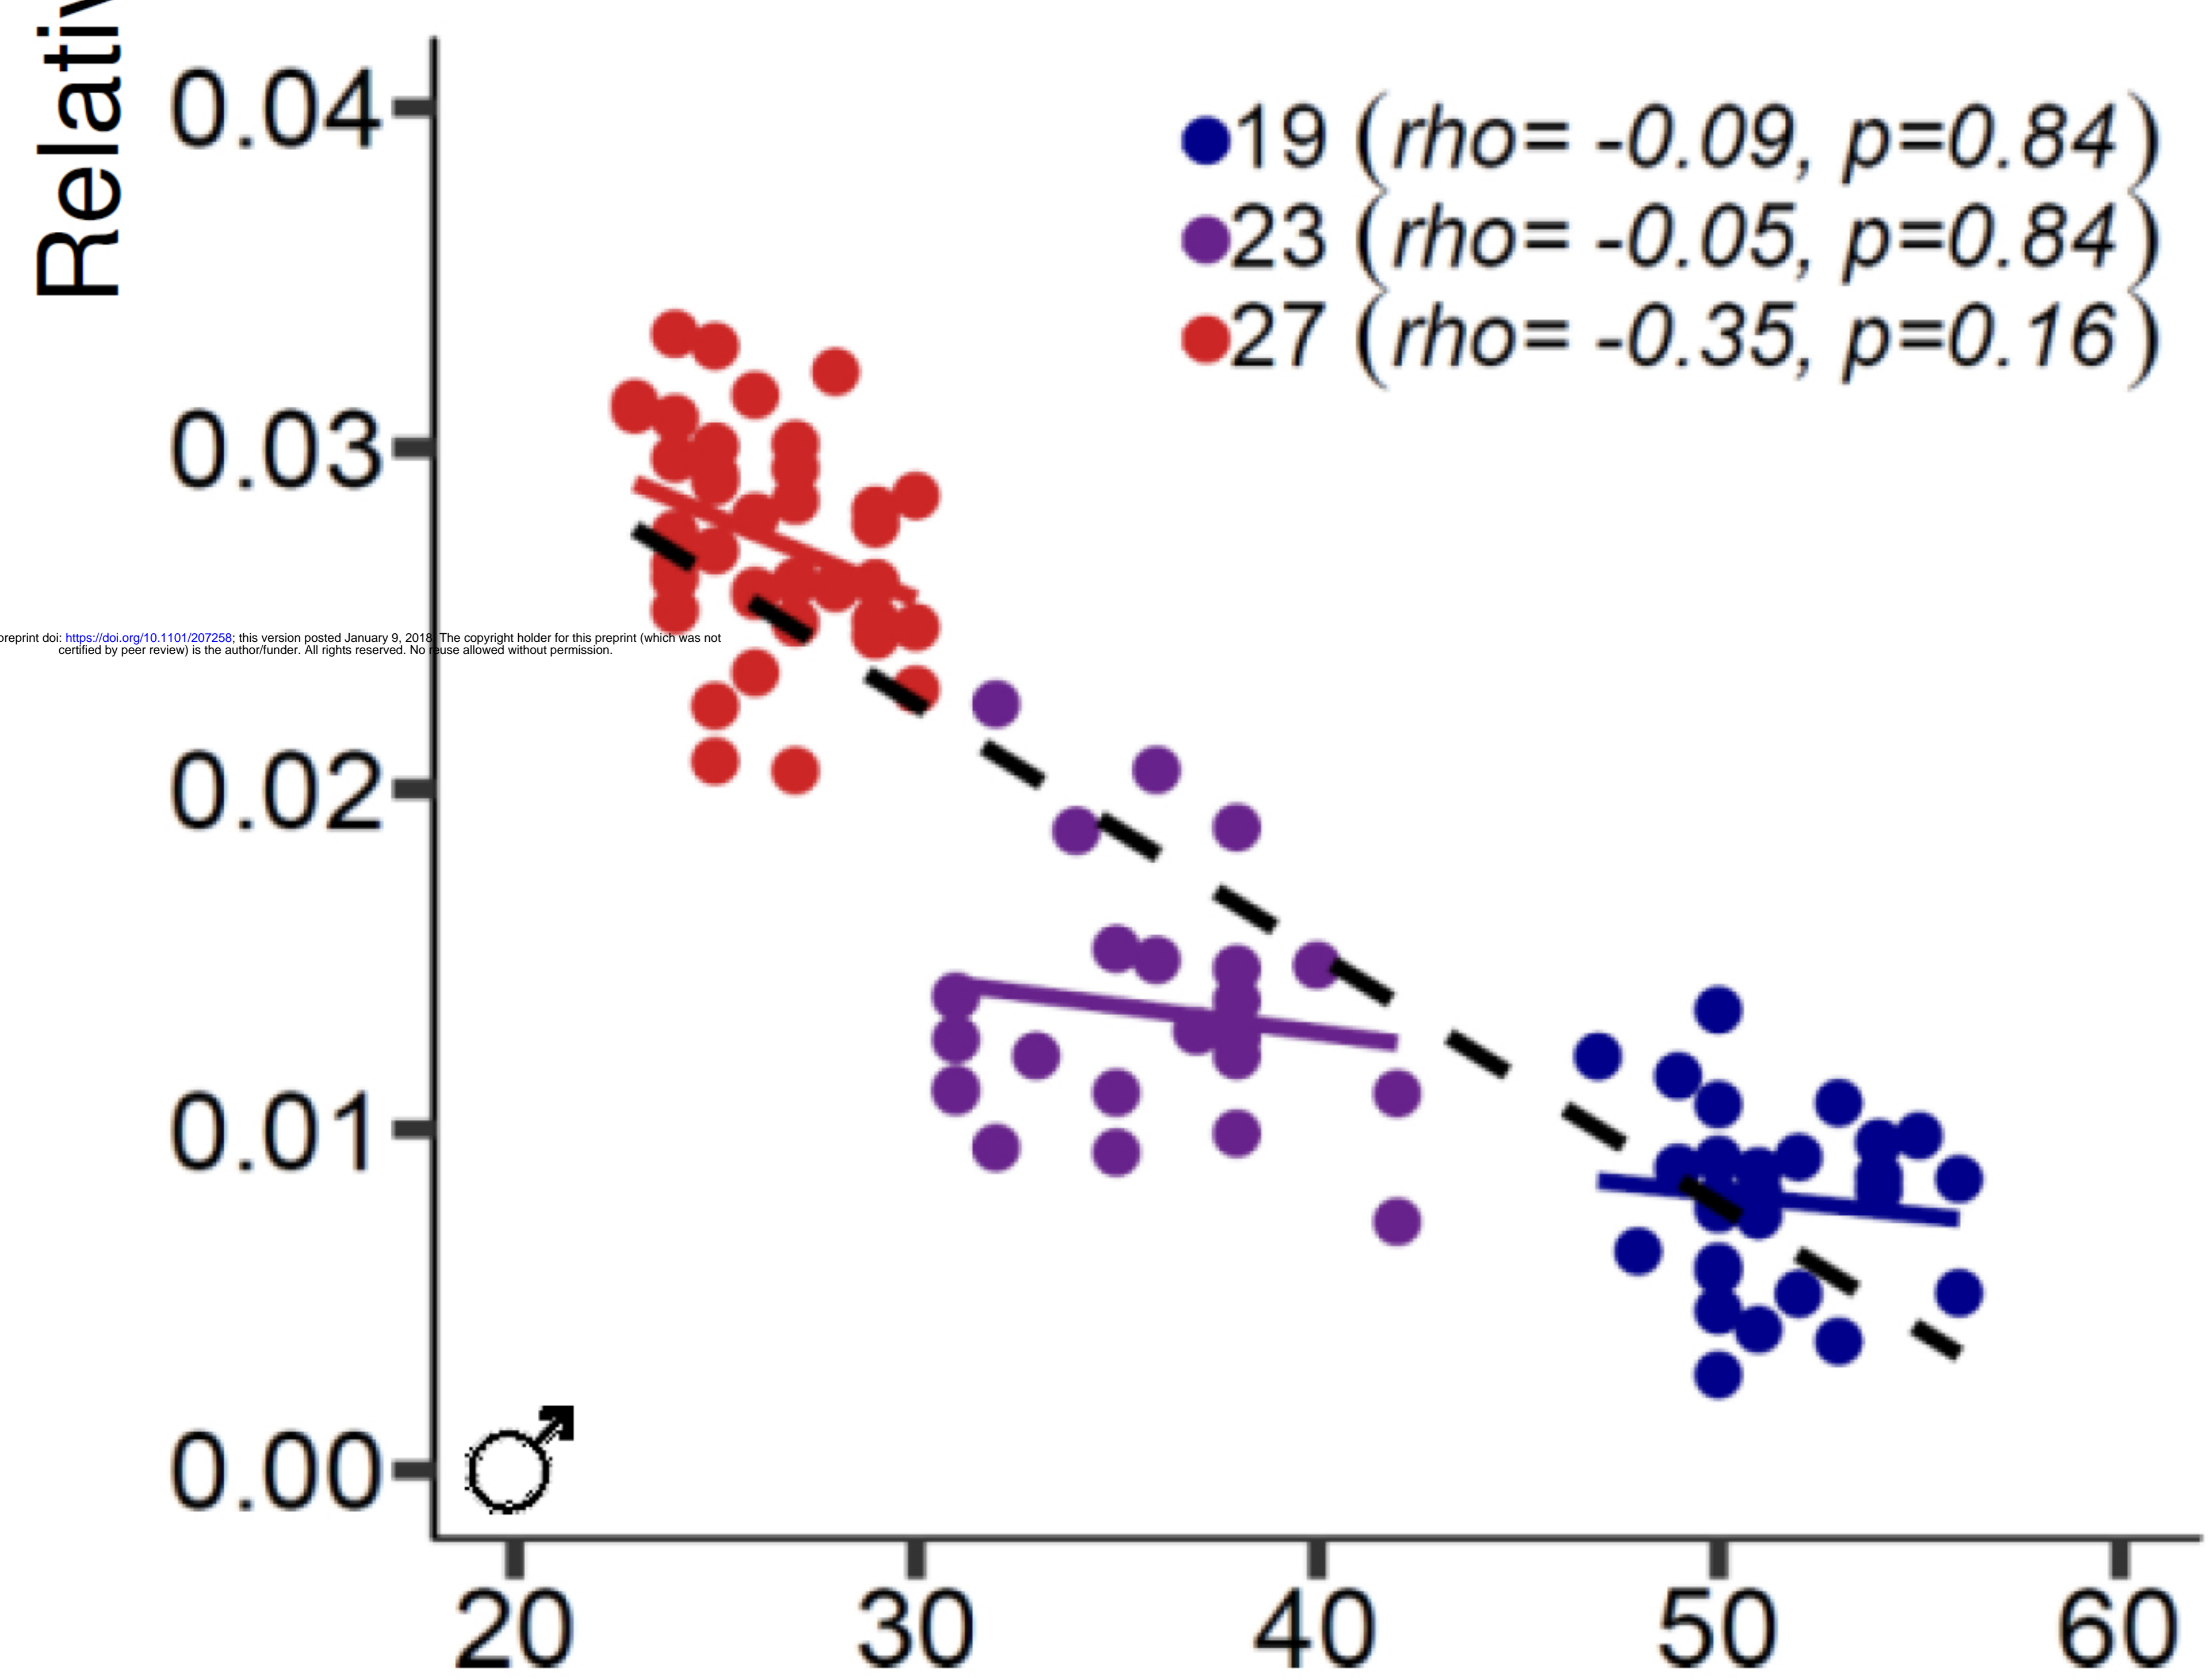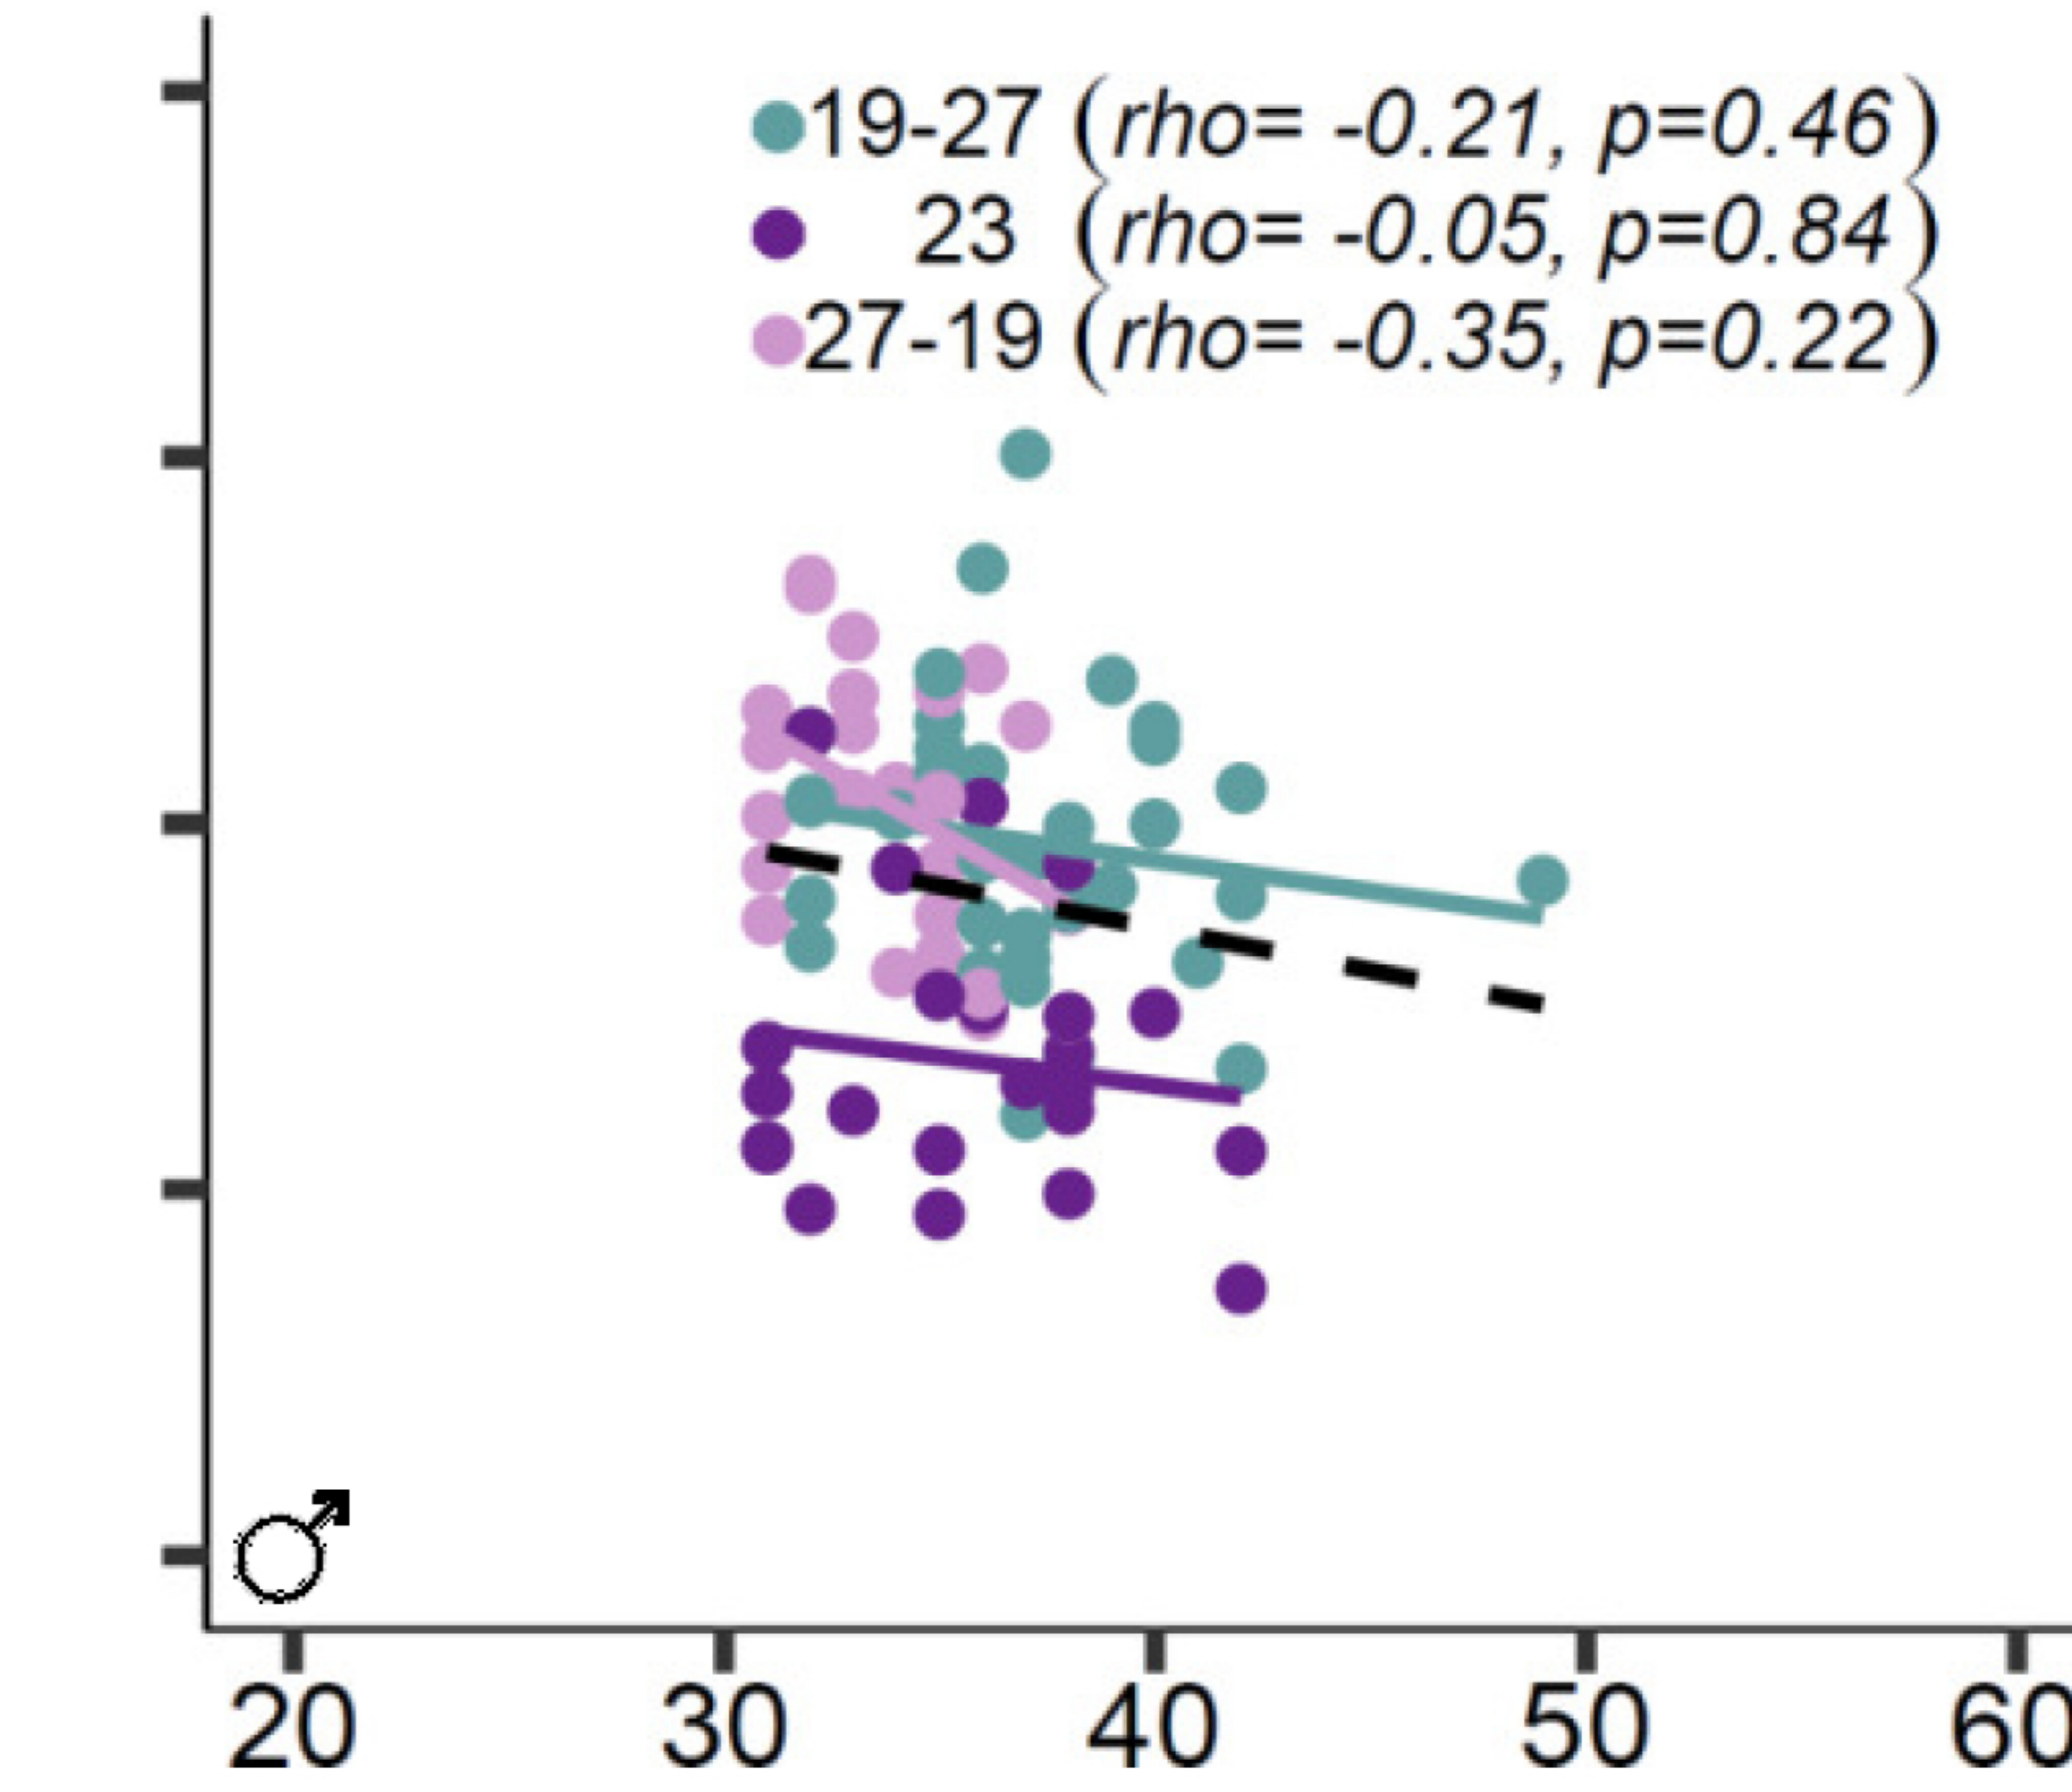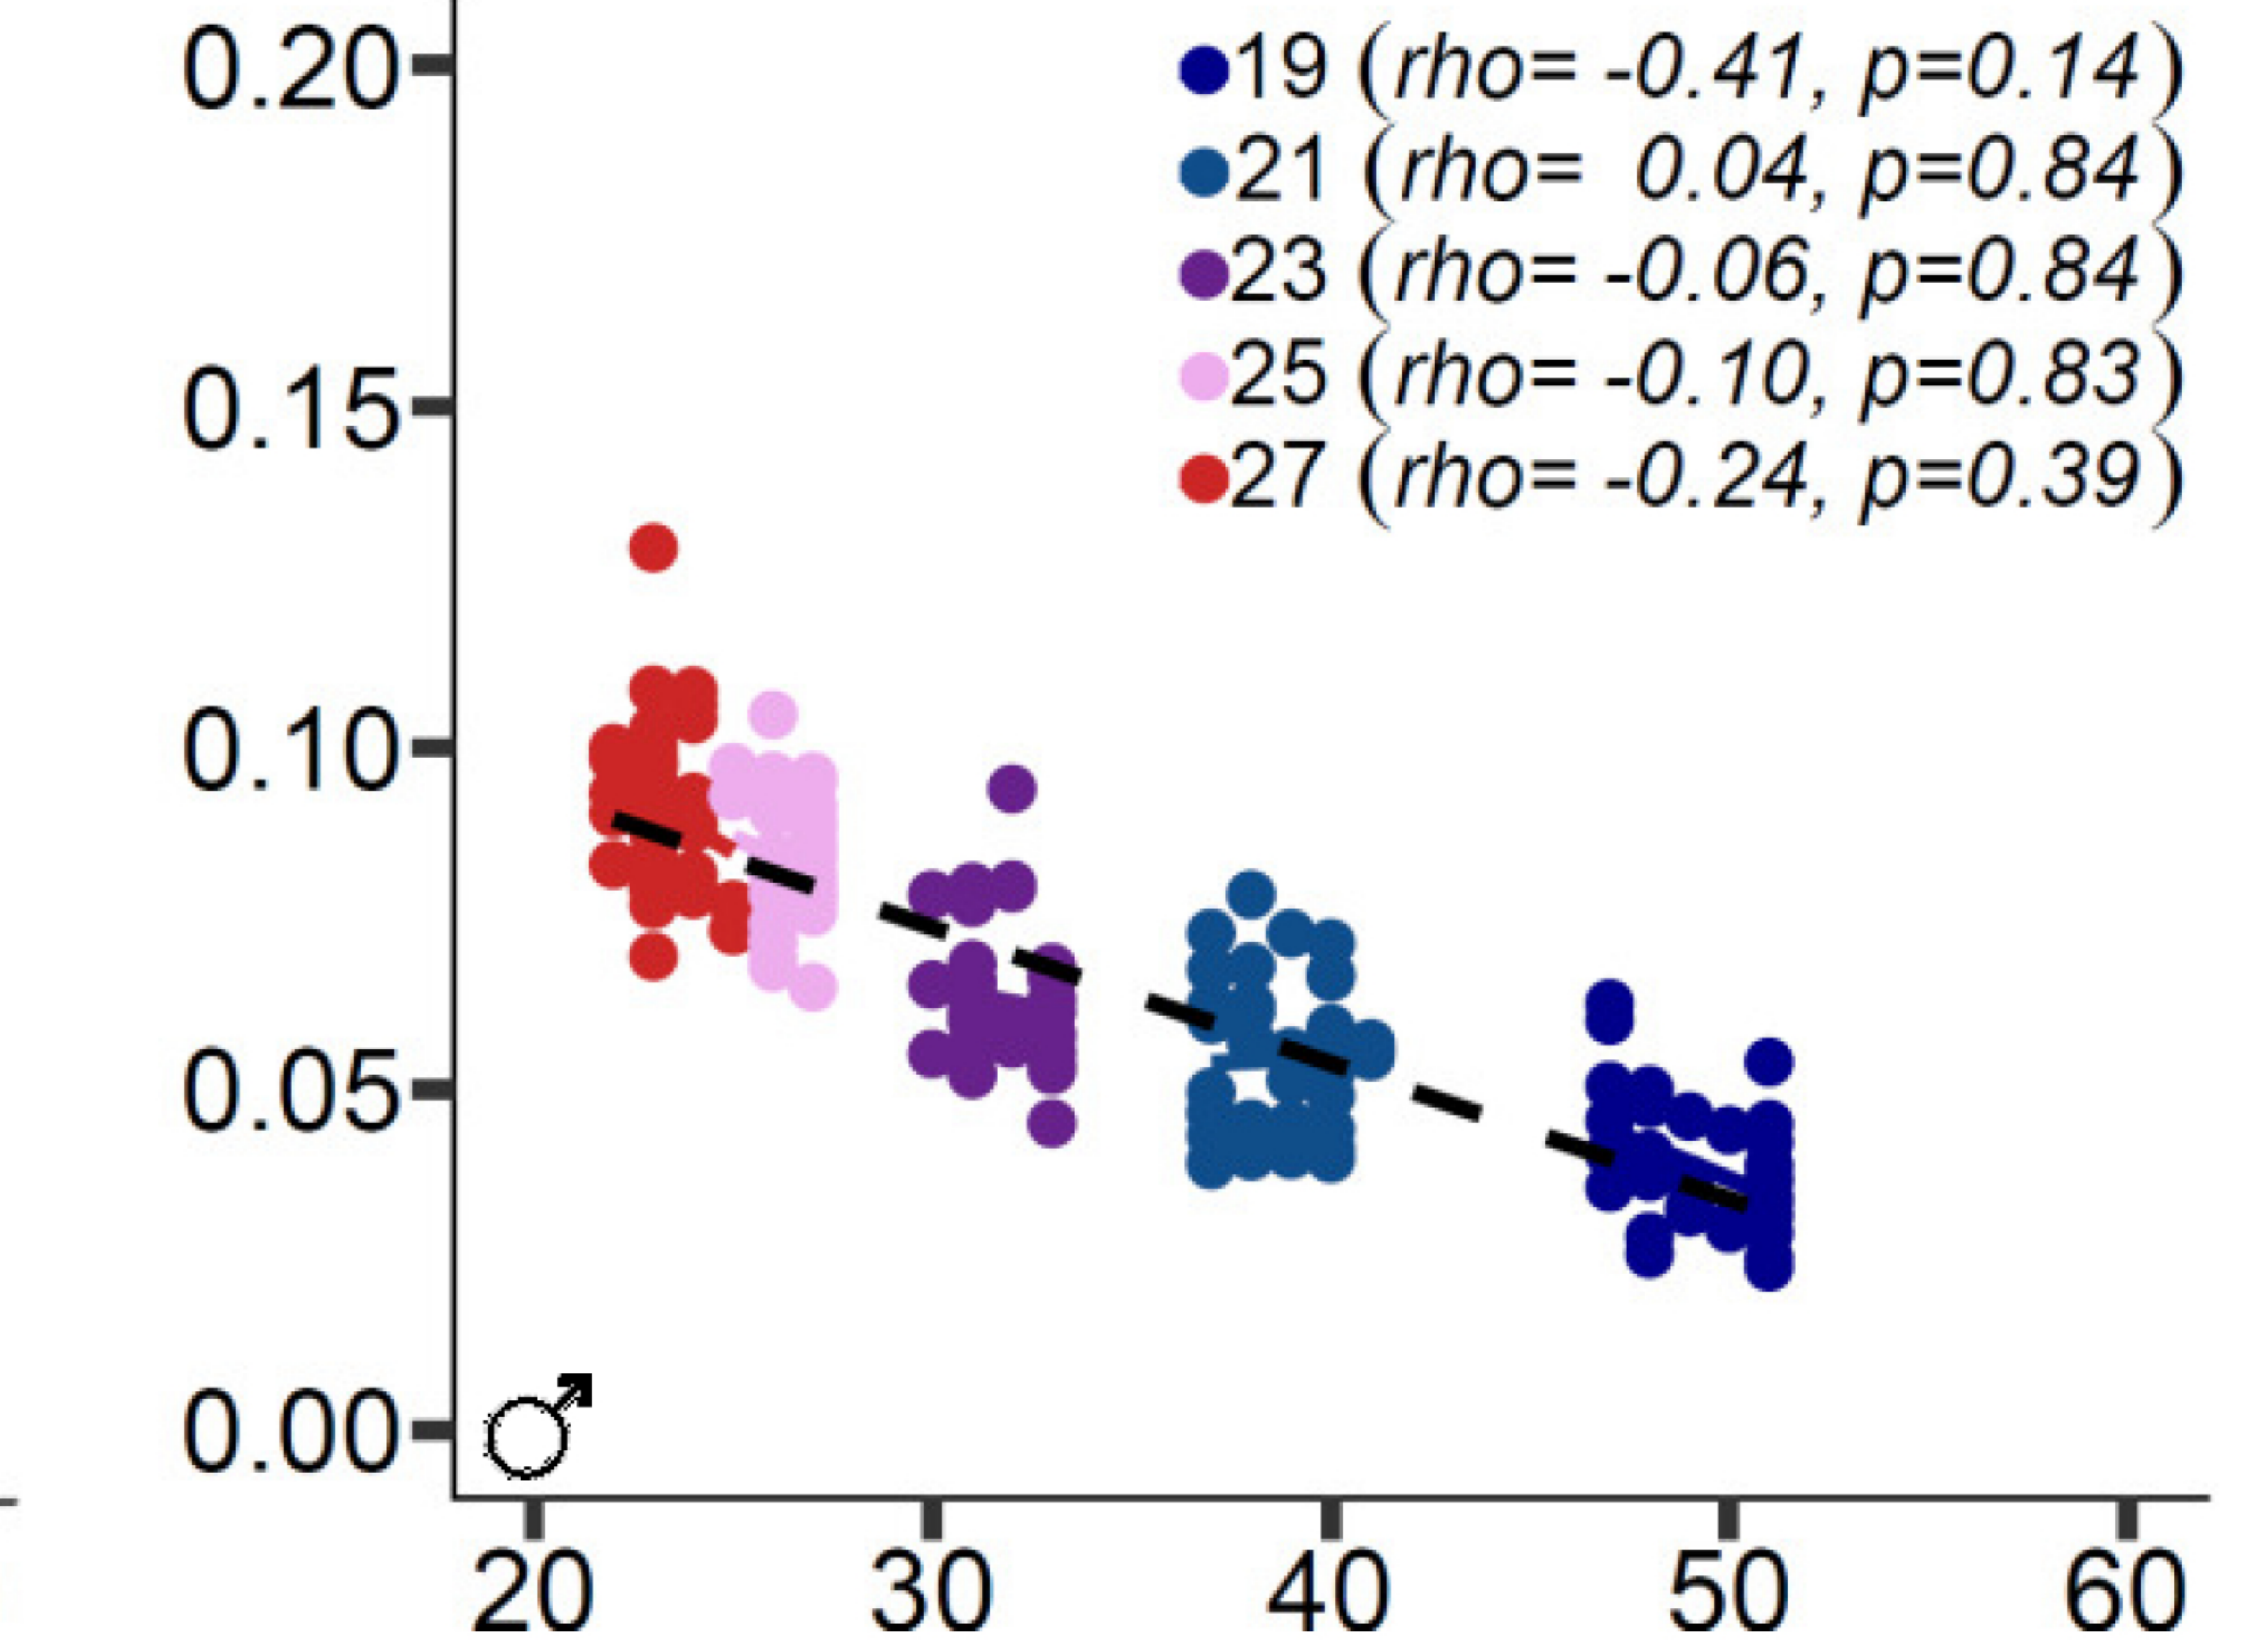

Developmental time
